# Supplementary material for: Alkylene-bridged viologen dendrimers: versatile cell delivery tools with biosensing properties
Source: Royal Society of Chemistry journal article supplement (doi:10.1039/c4ob00560k), 2014-01-01
Supplement: c4ob00560k1.pdf [file c4ob00560k1.pdf]

**Supplement Information to**

**Alkylene-bridged Viologen Dendrimers:  
A Versatile Cell Delivery Tool With Biosensing Properties**

by

D. Bongard<sup>\*1)</sup>, W. Bohr<sup>2)</sup>, M. Swierczek<sup>3)</sup>, T.H. Degefa<sup>1)</sup>, L. Walder<sup>1)</sup>, R. Brandt<sup>3)</sup>

<sup>\*1)</sup> Institute of Chemistry of New Materials, University of Osnabrück  
Barbarastr. 7, D-49076 Osnabrück, Germany

1. NMR spectra: S1 – S24
2. Pictures of transfected CHO cells: S25

# 1. NMR spectra

<sup>1</sup>H-NMR spectra of compound 2 :

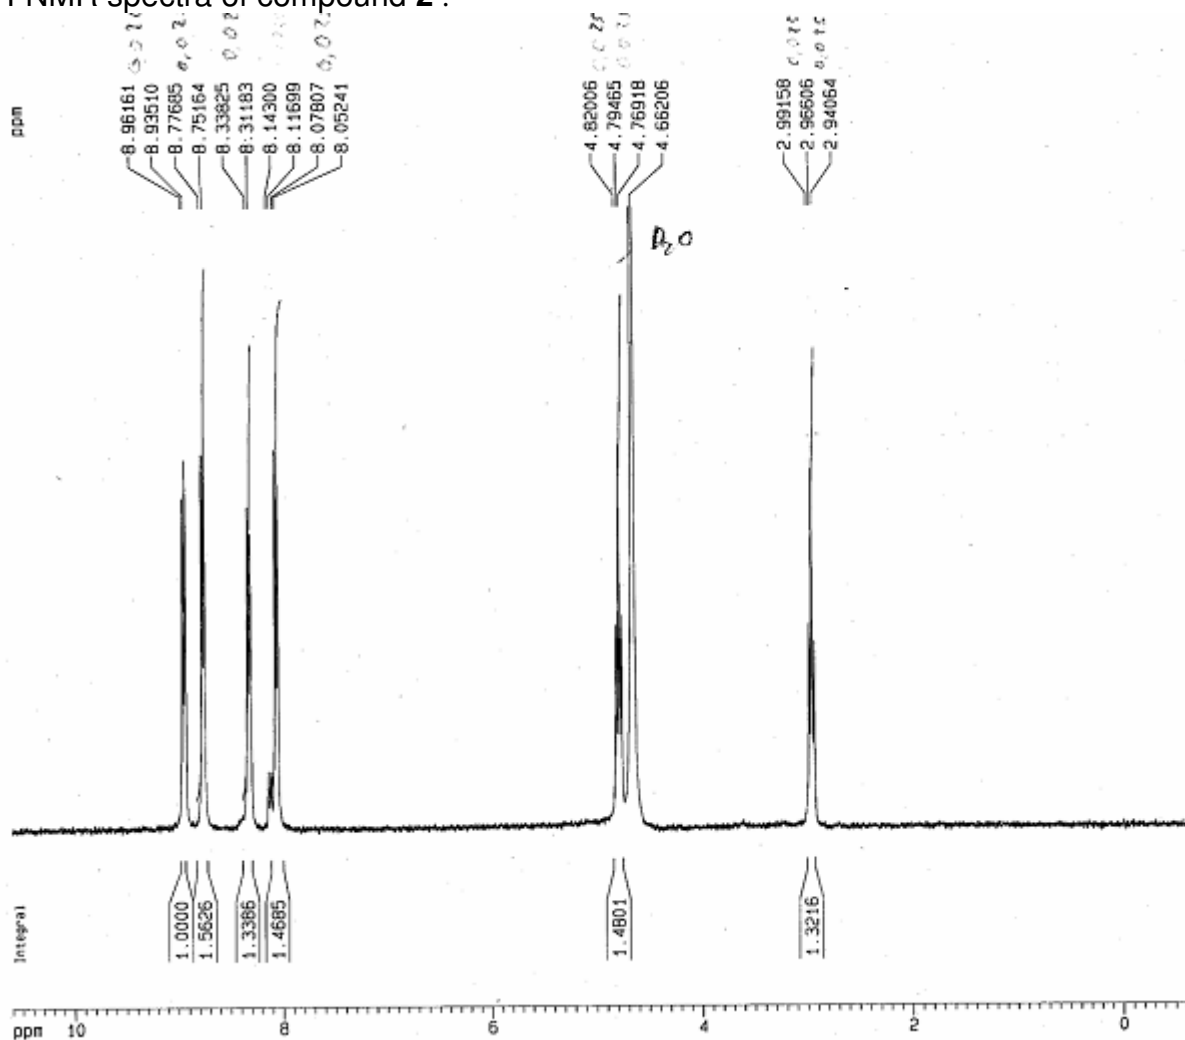

```

Current Data Parameters
NAME      db030905
EXPNO     7
PROCNO    1

F2 - Acquisition Parameters
Date_     20030905
Time      18.38
INSTRUM   spect
PROBHD    5 mm QNP 1H/1
PULPROG   zg30
TD         32768
SOLVENT   D2O
NS         32
DS         2
SMH        514.033 Hz
FIDRES     0.156983 Hz
AQ         3.1850996 sec
RG         2298.8
CW         97.200 usec
DE         6.00 usec
TE         300.0 K
D1         1.00000000 sec

----- CHANNEL f1 -----
NUC1       1H
P1         10.40 usec
PL1        -4.00 dB
SFO1       250.1315447 MHz

F2 - Processing parameters
SI         18384
SF         250.1300107 MHz
WDW        EM
SSB        0
LB         0.30 Hz
GB         0
PC         1.00

1D NMR plot parameters
CX         20.00 cm
F1P        10.607 ppm
F1         2653.10 Hz
F2P        -0.644 ppm
F2         -161.05 Hz
PPHMC      0.56254 ppm/cm
HZCM       140.70760 Hz/cm
    
```

<sup>13</sup>C-NMR spectra of compound 2

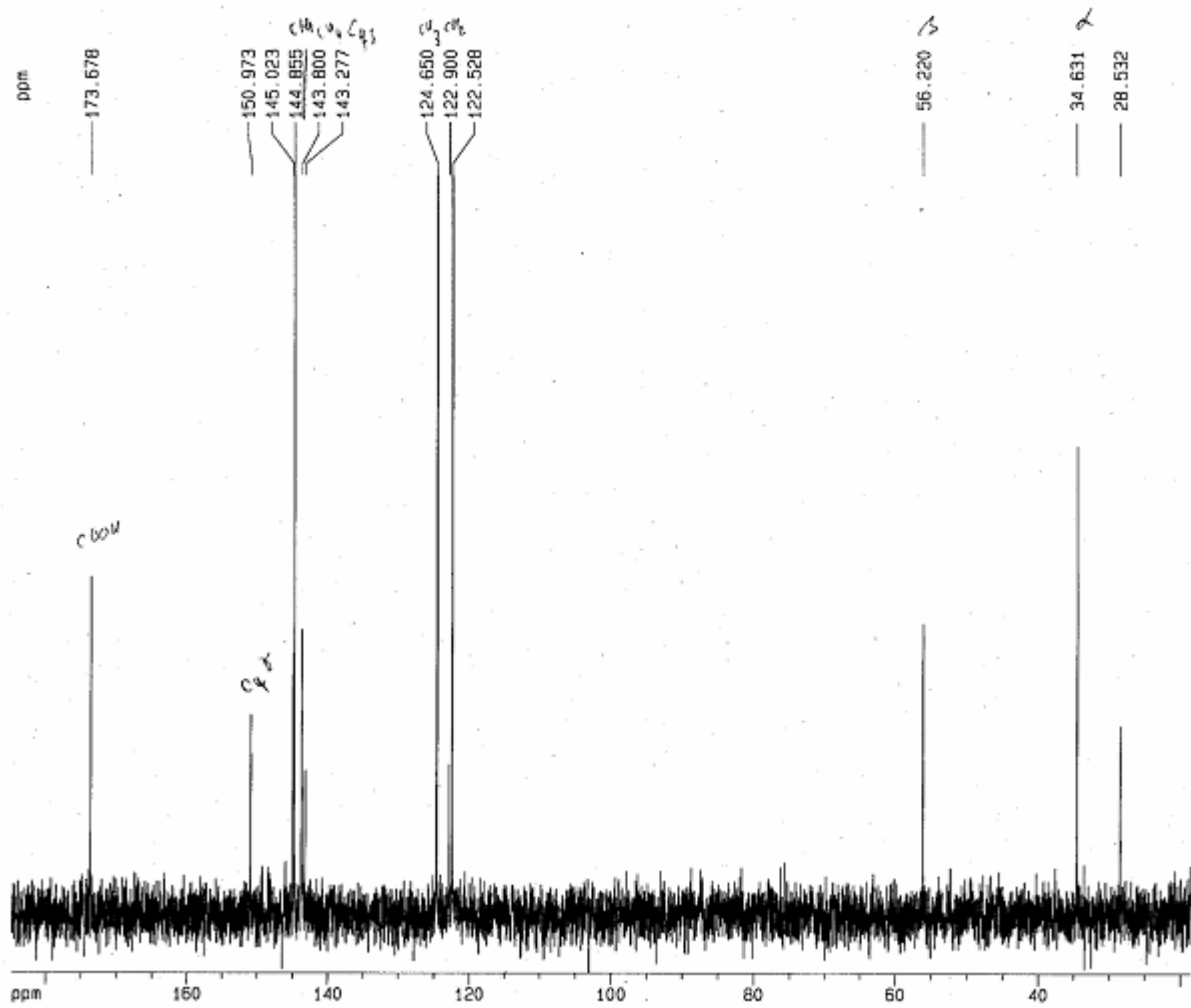

```

Current Data Parameters
NAME      db03082002
EXPNO    1
PROCNO   1

F2 - Acquisition Parameters
Date_    20030521
Time     15.05
INSTRUM  spect
PROBHD   5 mm DNP 1H/1
PULPROG  zgpg30
TD        65536
SOLVENT  D2O
NS        23002
DS        4
SWH       15723.271 Hz
FIDRES    0.239918 Hz
AQ        2.0840948 sec
RG        32768
CW        31.800 usec
DE        6.00 usec
TE        300.0 K
D1        2.00000000 sec
d11       0.03000000 sec
d12       0.00020000 sec

***** CHANNEL f1 *****
NUC1      13C
P1        10.00 usec
PL1       0.00 dB
SFO1     62.9021320 MHz

***** CHANNEL f2 *****
CPDPRG2  waltz16
NUC2      1H
PCPD2     80.00 usec
PL2       -4.00 dB
PL12      15.00 dB
PL13      20.00 dB
SFO2     250.1310005 MHz

F2 - Processing parameters
SI        32768
SF        62.8953424 MHz
WDW       EM
SSB       0
LB        1.00 Hz
GB        0
PC        1.40

1D NMR plot parameters
CX        20.00 cm
F1P       184.847 ppm
F1        11626.03 Hz
F2P       18.541 ppm
F2        1166.13 Hz
PPMCM     8.31532 ppm/cm
HZCM      522.89512 Hz/cm
    
```

ESI-MS spectra of compound **2** : 1-Carboxyethyl-4,4'-bipyridinium-hexafluorophosphat

Apex Mass Spectrum of Peak 4.409 of PRN30.D

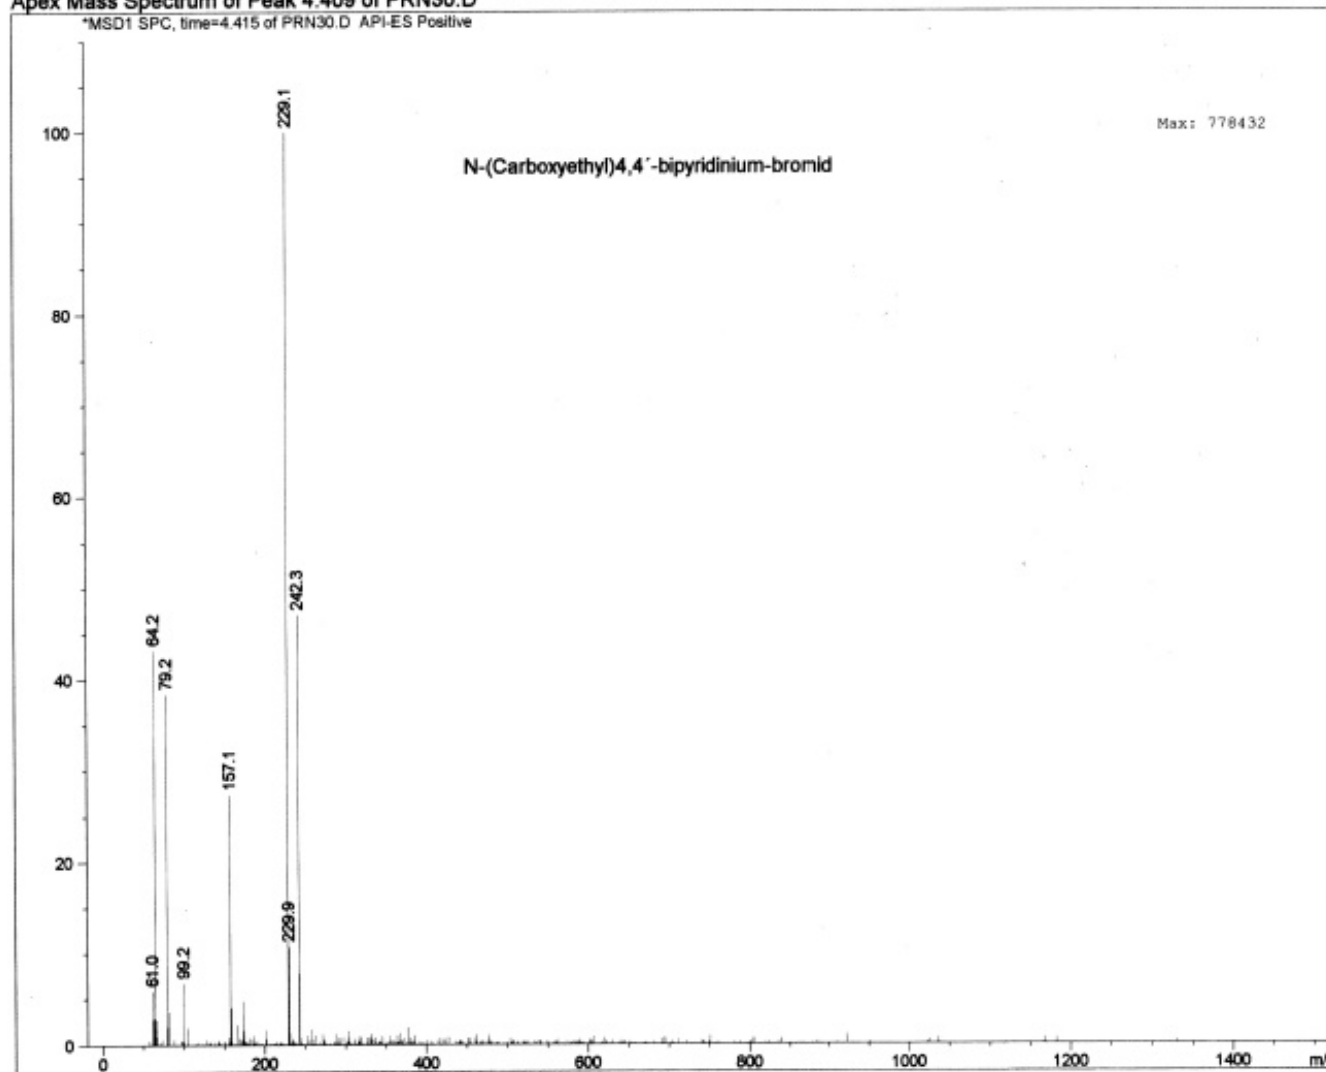

<sup>1</sup>H-NMR spectra of compound 3 :

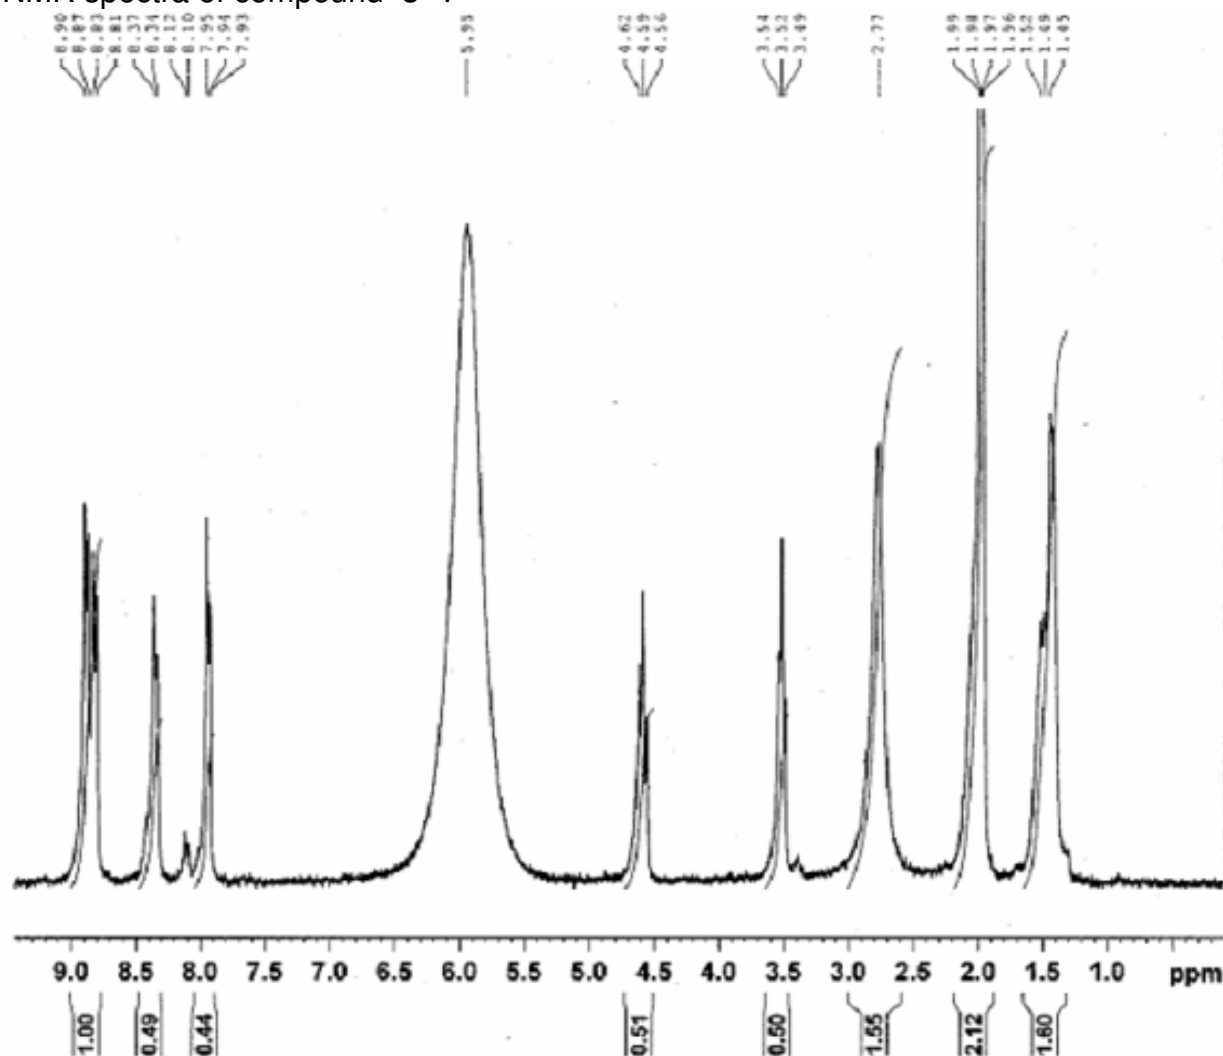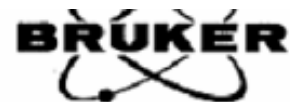

Current Data Parameters  
 NAME db092701  
 EXPNO 2  
 PROCNO 1

F2 - Acquisition Parameters  
 Date\_ 20090327  
 Time 19.29  
 INSTRUM spect  
 PROBHD 5 mm QNP 1H/13  
 PULPROG zg30  
 TD 32768  
 SOLVENT CD3CN  
 NS 32  
 DS 2  
 SWH 5144.033 Hz  
 FIDRES 0.156983 Hz  
 AQ 3.1850996 sec  
 RG 1024  
 DW 97.200 usec  
 DE 6.00 usec  
 TE 295.2 K  
 D1 1.00000000 sec  
 TDO 1

----- CHANNEL f1 -----  
 NUC1 1H  
 P1 10.40 usec  
 PL1 -4.00 dB  
 SFO1 250.1315447 MHz

F2 - Processing parameters  
 SI 16384  
 SF 250.1300000 MHz  
 KDW EM  
 SSB 0  
 LB 0.30 Hz  
 GB 0  
 PC 1.00

<sup>13</sup>C-NMR spectra of compound **3** :

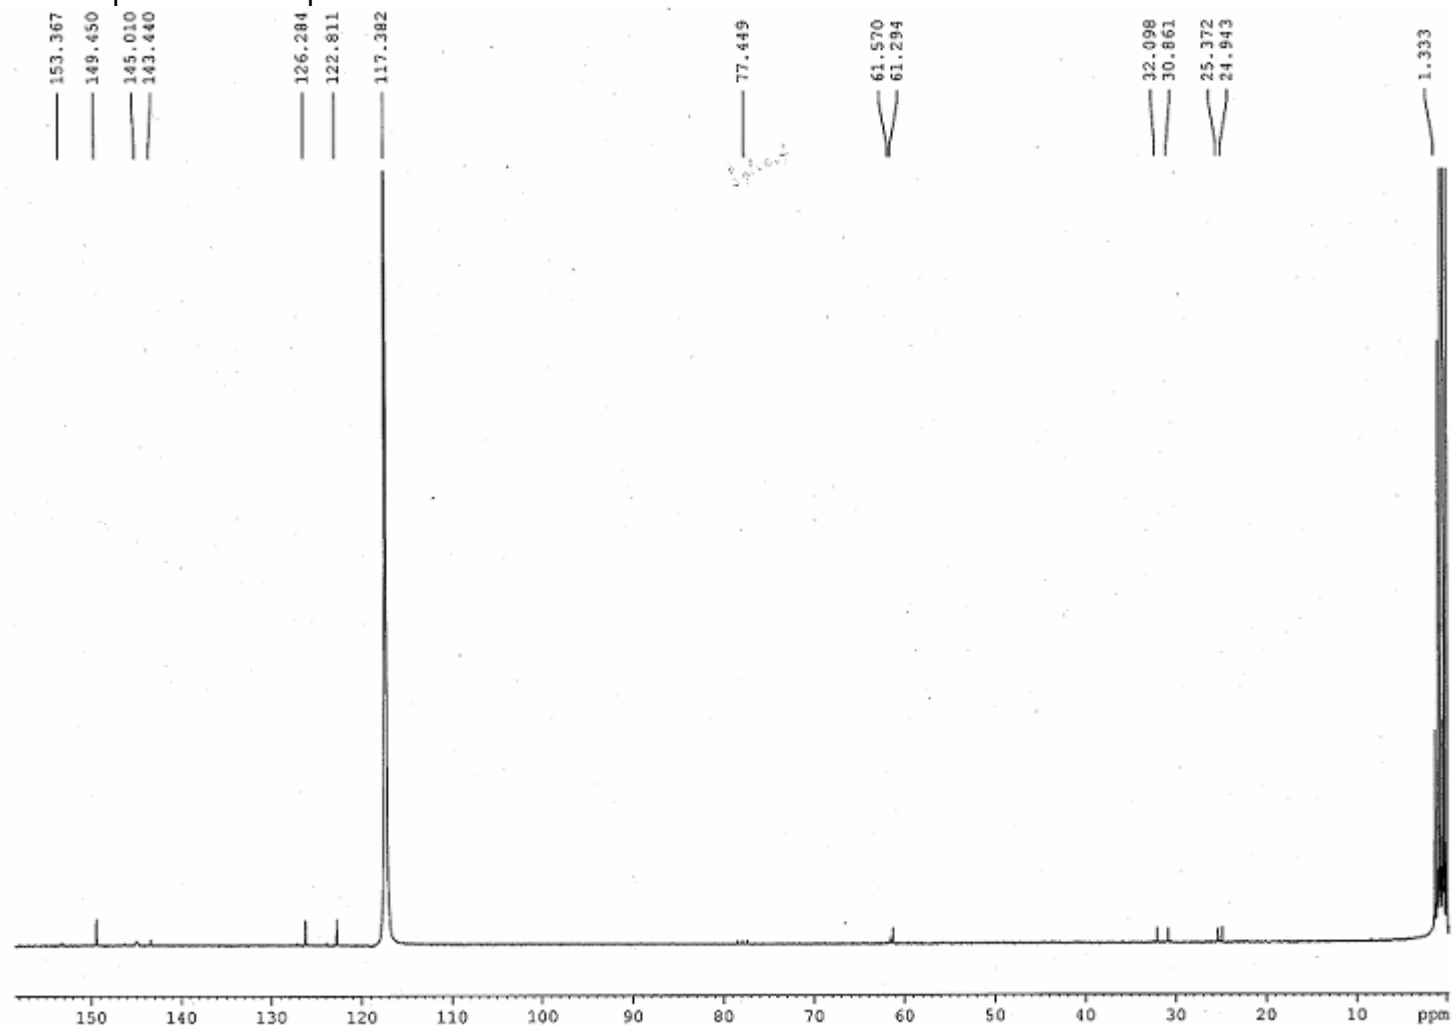

```

Current Data Parameters
NAME      db090410A
EXPNO     1
PROCNO    1

F2 - Acquisition Parameters
Date_     20090411
Time      13.27
INSTRUM   spect
PROBHD    5 mm QNP 1H/13
PULPROG   zgpg30
TD         65536
SOLVENT   CD3CN
NS         20000
DS         4
SMH        15060.241 Hz
FIDRES     0.229801 Hz
AQ         2.1758451 sec
RG         4597.6
DW         33.200 usec
DE         6.00 usec
TE         296.2 K
D1         2.00000000 sec
d11        0.03000000 sec
DELTA     1.89999998 sec
TD0        1

----- CHANNEL f1 -----
NUC1       13C
P1         10.00 usec
PL1        0.00 dB
SFO1       62.9015280 MHz

----- CHANNEL f2 -----
CPDPRG2    waltz16
NUC2       1H
PCPD2      80.00 usec
PL2        -4.00 dB
PL12       15.00 dB
PL13       20.00 dB
SFO2       250.1310005 MHz

F2 - Processing parameters
SI         32768
SF         62.8952390 MHz
WDW        EM
SSB        0
LB         1.00 Hz
GB         0
PC         1.40
    
```

ESI-MS spectra of compound **3**: 1-(6-Hydroxyhexyl)-4,4'-bipyridinium-hexafluorophosphate

**Acquisition Parameter**

|                   |                     |              |            |                          |         |
|-------------------|---------------------|--------------|------------|--------------------------|---------|
| Ion Source Type   | ESI                 | Ion Polarity | Negative   | Alternating Ion Polarity | on      |
| Mass Range Mode   | Enhanced Resolution | Scan Begin   | 75 m/z     | Scan End                 | 600 m/z |
| Accumulation Time | 143 $\mu$ s         | RF Level     | 54 %       | Trap Drive               | 50.0    |
| SPS Target Mass   | 287 m/z             | Averages     | 10 Spectra | Auto MS/MS               | off     |

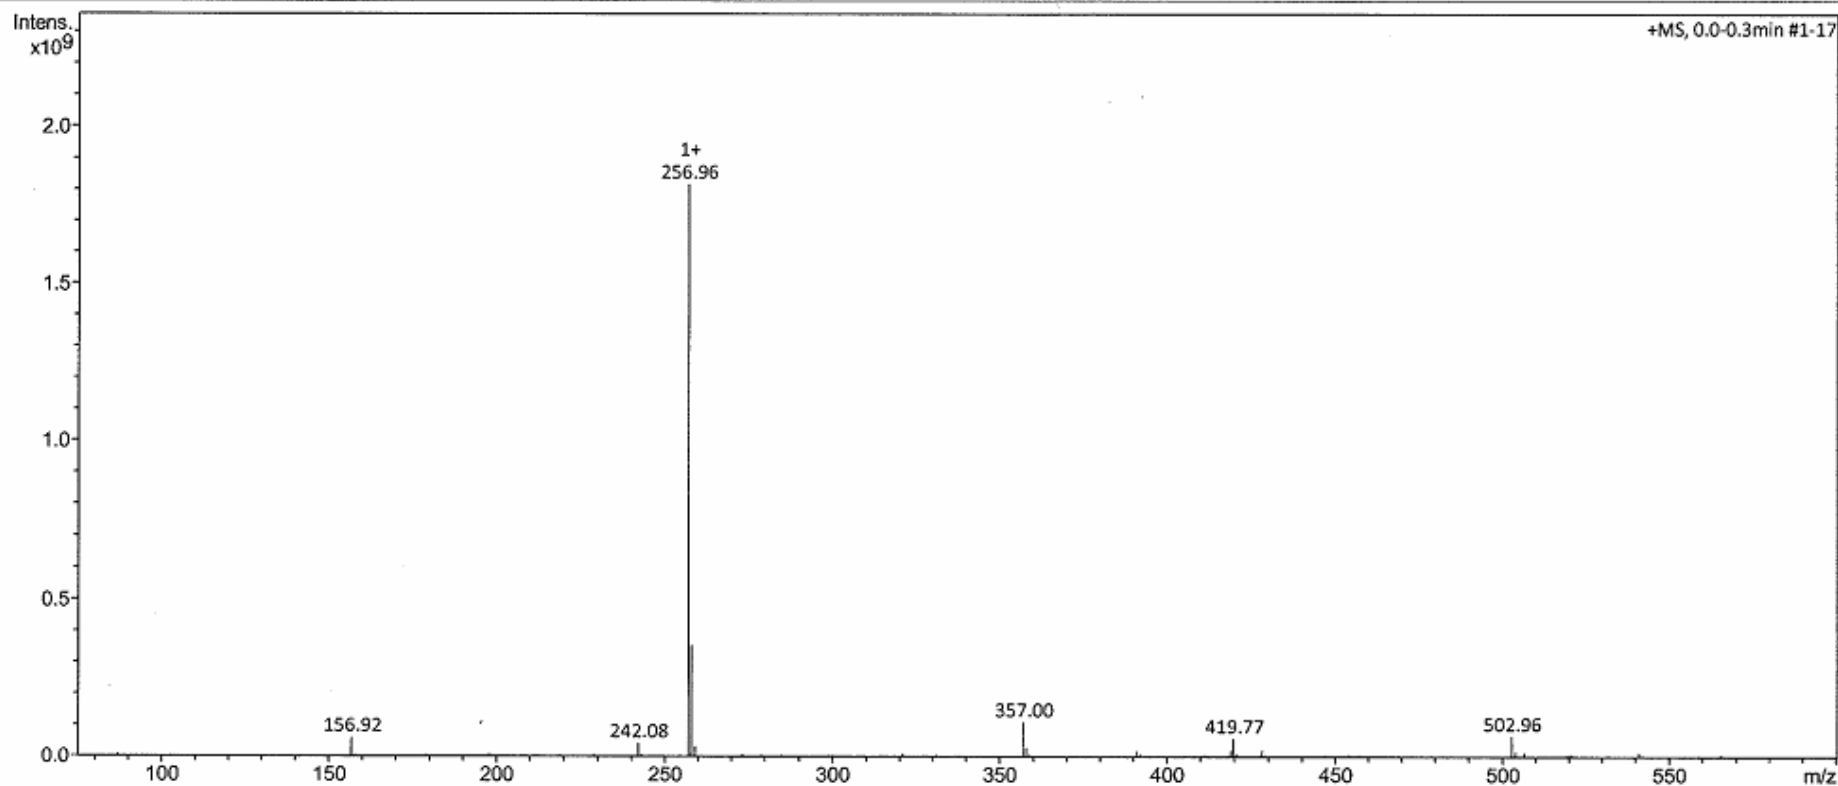

<sup>1</sup>H-NMR spectra of compound 4 :

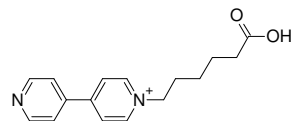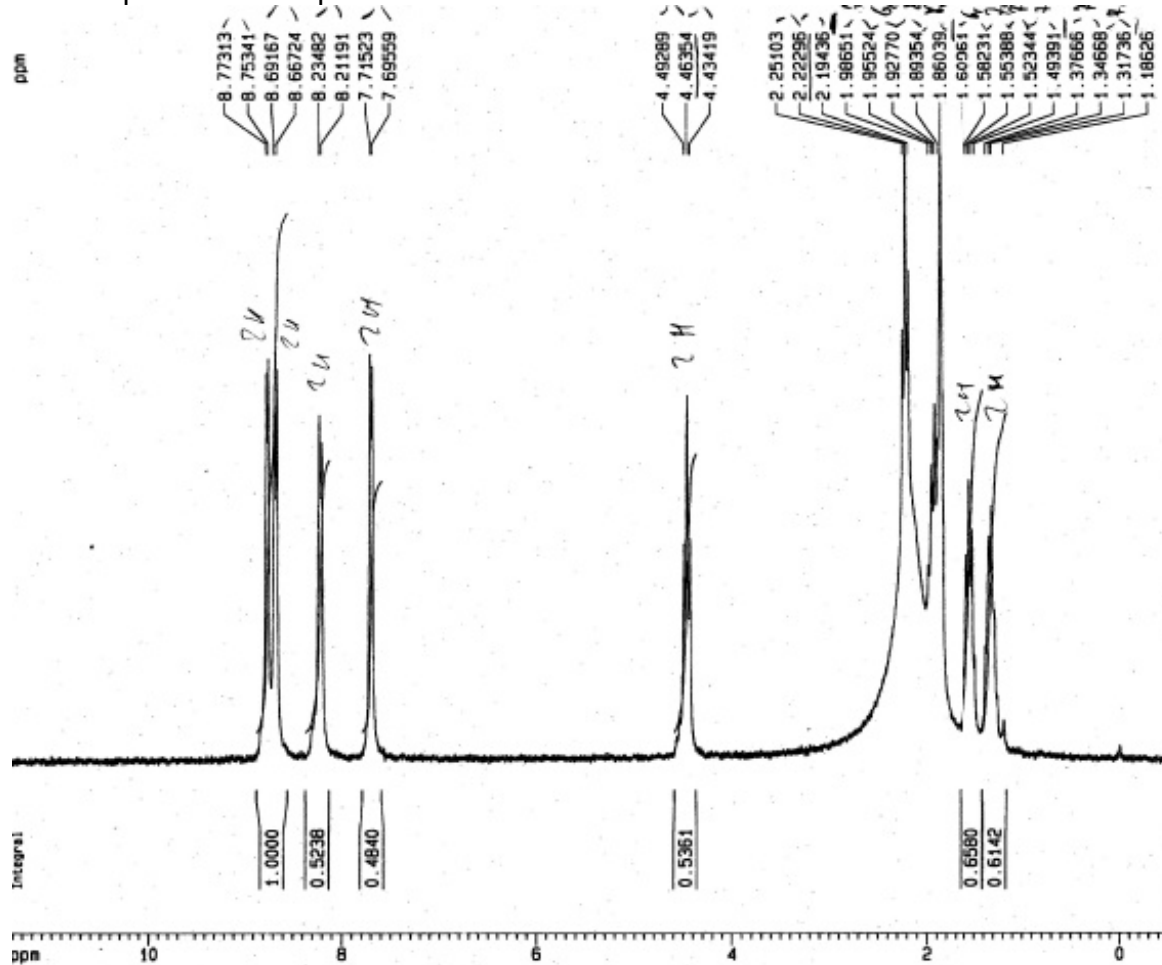

```

NAME      db05063002
EXPNO     2
PROCNO    1

F2 - Acquisition Parameters
Date_     20050630
Time      15.28
INSTRUM   spect
PROBHD    5 mm QNP 1H/1
PULPROG   zg30
TD         32768
SOLVENT   CD3CN
NS         32
DS         2
SWH        5144.033 Hz
FIDRES     0.156983 Hz
AQ         3.1850996 sec
RG         1625.5
DM         97.200 usec
DE         6.00 usec
TE         300.0 K
D1         1.00000000 sec

----- CHANNEL f1 -----
NUC1       1H
P1         10.40 usec
PL1        -4.00 dB
SFO1       250.1315447 MHz

F2 - Processing parameters
SI         16384
SF         250.1300284 MHz
WOM        EM
SSB        0
LB         0.30 Hz
GB         0
PC         1.00

1D NMR plot parameters
CX         20.00 cm
F1P        11.427 ppi
F1         2898.25 Hz
F2P        -0.484 ppi
F2         -121.03 Hz
PPMCK      0.59555 ppi
HZCK       148.96376 Hz
    
```



<sup>13</sup>C-NMR spectra of compound 4 :

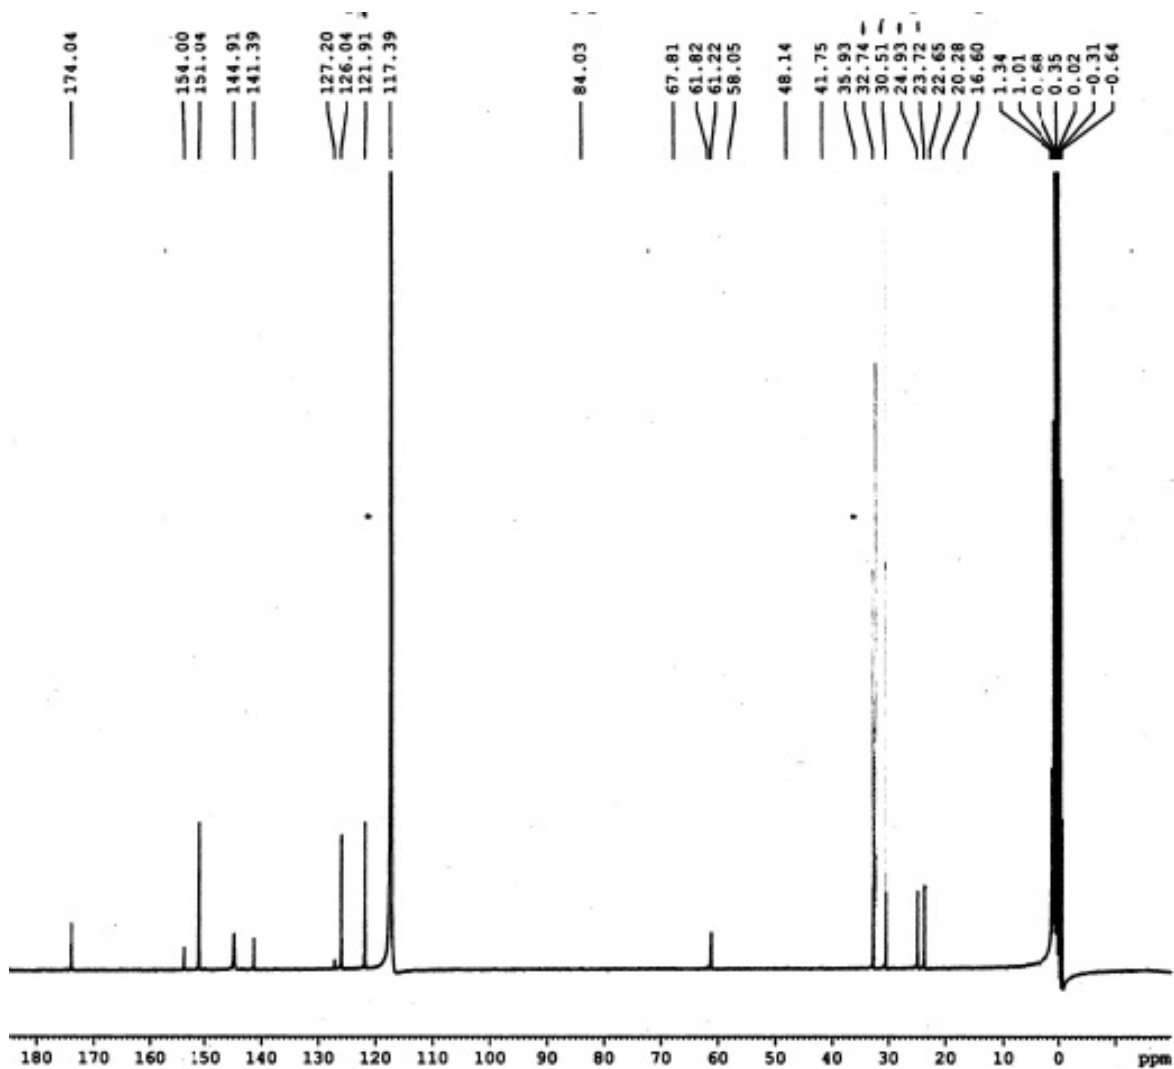

Current Data Parameters  
 NAME db08031302  
 EXPNO 1  
 PROCNO 1

F2 - Acquisition Parameters  
 Date\_ 20080315  
 Time\_ 18.02  
 INSTRUM spect  
 PROBED 5 mm QNP 1H/13  
 PULPROG zgpg30  
 TD 65536  
 SOLVENT CD3CN  
 NS 20000  
 DS 4  
 SWH 15060.241 Hz  
 FIDRES 0.229801 Hz  
 AQ 2.1758451 sec  
 RG 4597.6  
 DW 33.200 usec  
 DE 6.00 usec  
 TE 295.2 K  
 D1 2.00000000 sec  
 d11 0.03000000 sec  
 DELTA 1.89999998 sec  
 TDO 1

CHANNEL f1  
 NUCL1 13C  
 P1 10.00 usec  
 PL1 0.00 dB  
 SFO1 62.9015280 MHz

CHANNEL f2  
 CPDPRG2 waltz16  
 NUCL2 1H  
 PCPD2 80.00 usec  
 PL2 -4.00 dB  
 PL12 15.00 dB  
 PL13 20.00 dB  
 SFO2 250.1310005 MHz

F2 - Processing parameters  
 SI 32768  
 SF 62.8952390 MHz  
 WDW EM  
 SSB 0  
 LB 1.00 Hz  
 GB 0  
 PC 1.40

ESI-MS spectra of compound 4 :

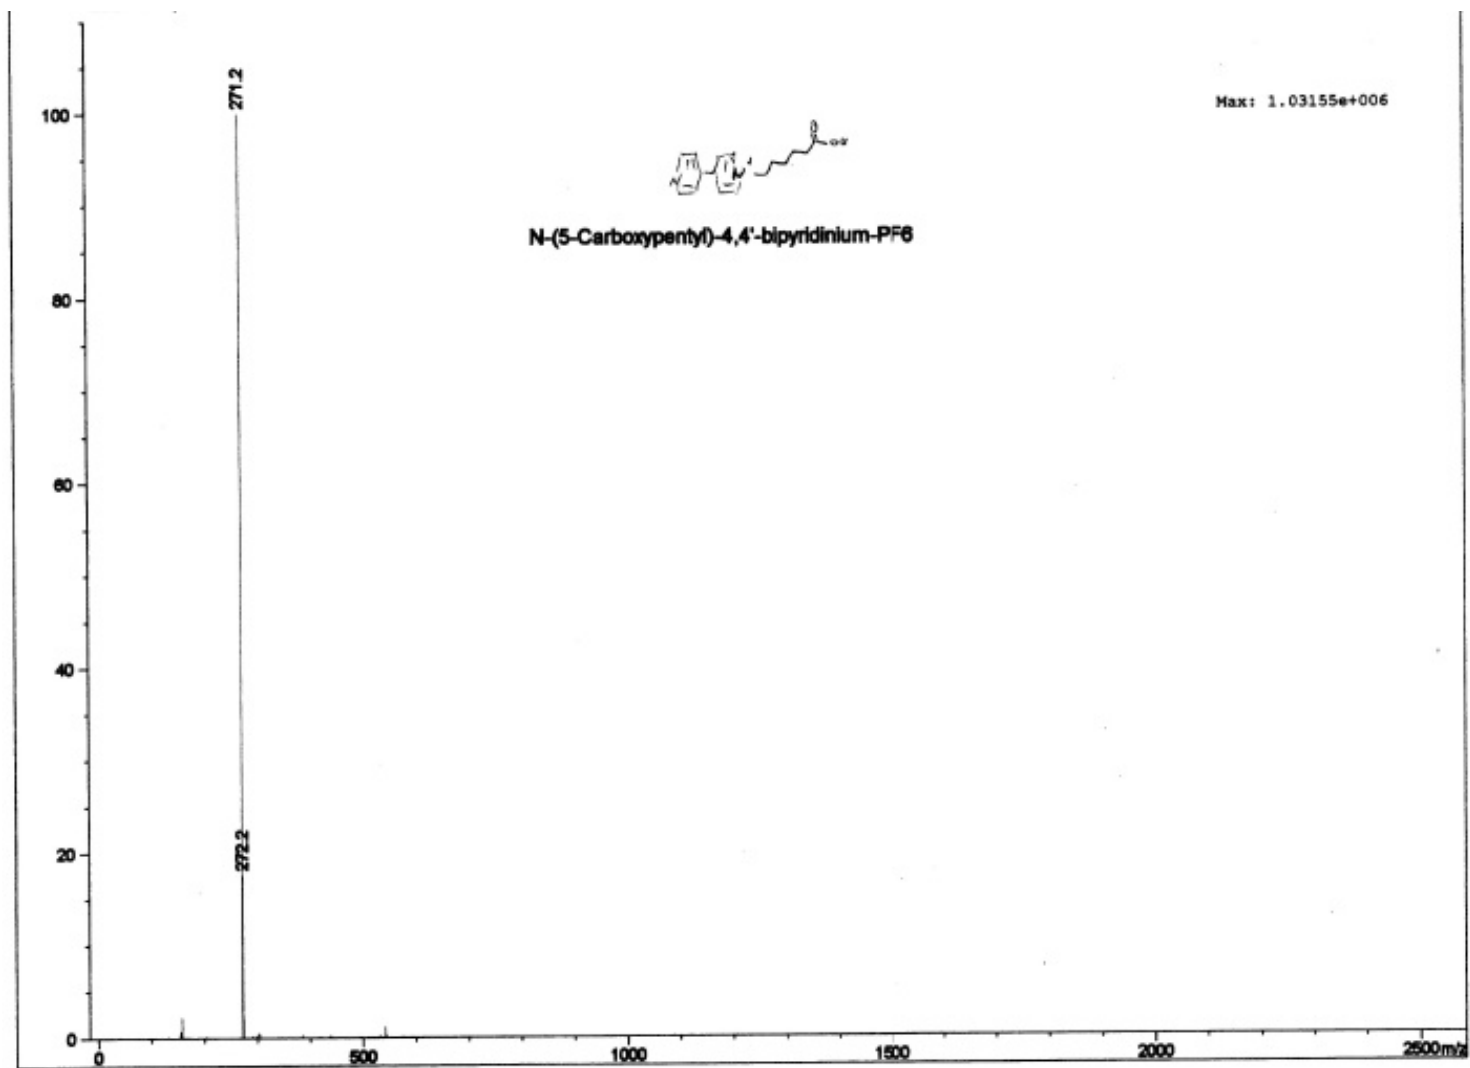

<sup>1</sup>H-NMR spectra of compound 5

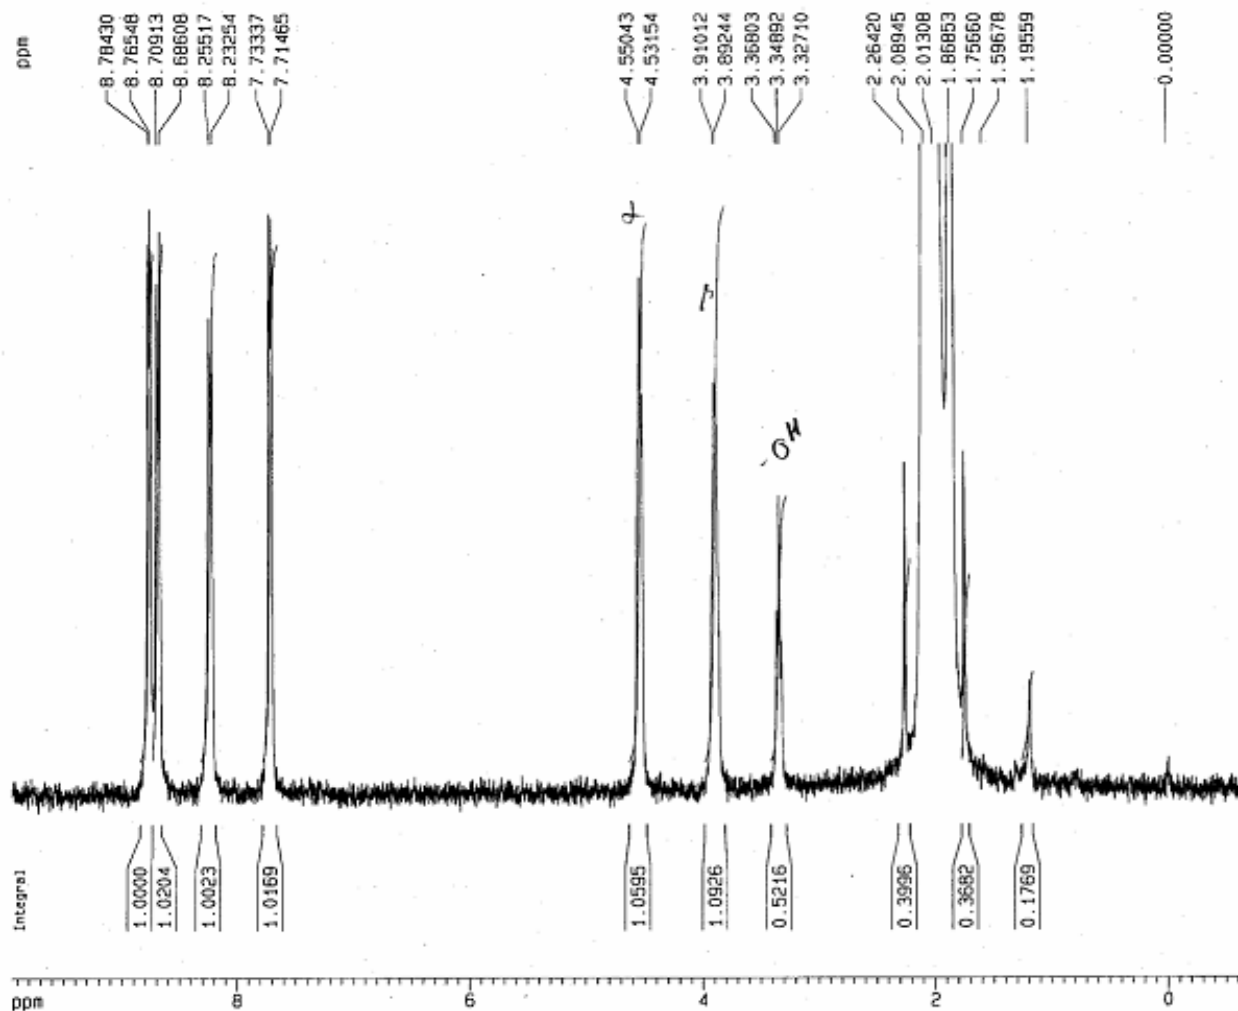

Current Data Parameters  
 NAME db06051202  
 EXPNO 2  
 PROCNO 1

F2 - Acquisition Parameters  
 Date\_ 20050512  
 Time 9.56  
 INSTRUM spect  
 PROBHD 5 mm QNP 1H/1  
 PULPROG zg30  
 TD 32768  
 SOLVENT CD3CN  
 NS 32  
 DS 2  
 SWH 5144.033 Hz  
 FIDRES 0.156993 Hz  
 AQ 3.1650996 sec  
 RG 1290.2  
 DW 97.200 usec  
 DE 8.00 usec  
 TE 300.0 K  
 D1 1.00000000 sec

----- CHANNEL f1 -----  
 NUC1 1H  
 P1 10.40 usec  
 PL1 -4.00 dB  
 SFO1 250.1315447 MHz

F2 - Processing parameters  
 SI 16384  
 SF 250.1300265 MHz  
 WDW EM  
 SSB 0  
 LB 0.30 Hz  
 GB 0  
 PC 1.00

1D NMR plot parameters  
 CX 20.00 cm  
 F1P 9.949 ppm  
 F1 2499.42 Hz  
 F2P -0.673 ppm  
 F2 -168.32 Hz  
 PPHOM 0.53107 ppm/cm  
 HZCM 132.83740 Hz/cm

<sup>13</sup>C-NMR spectra of compound 5

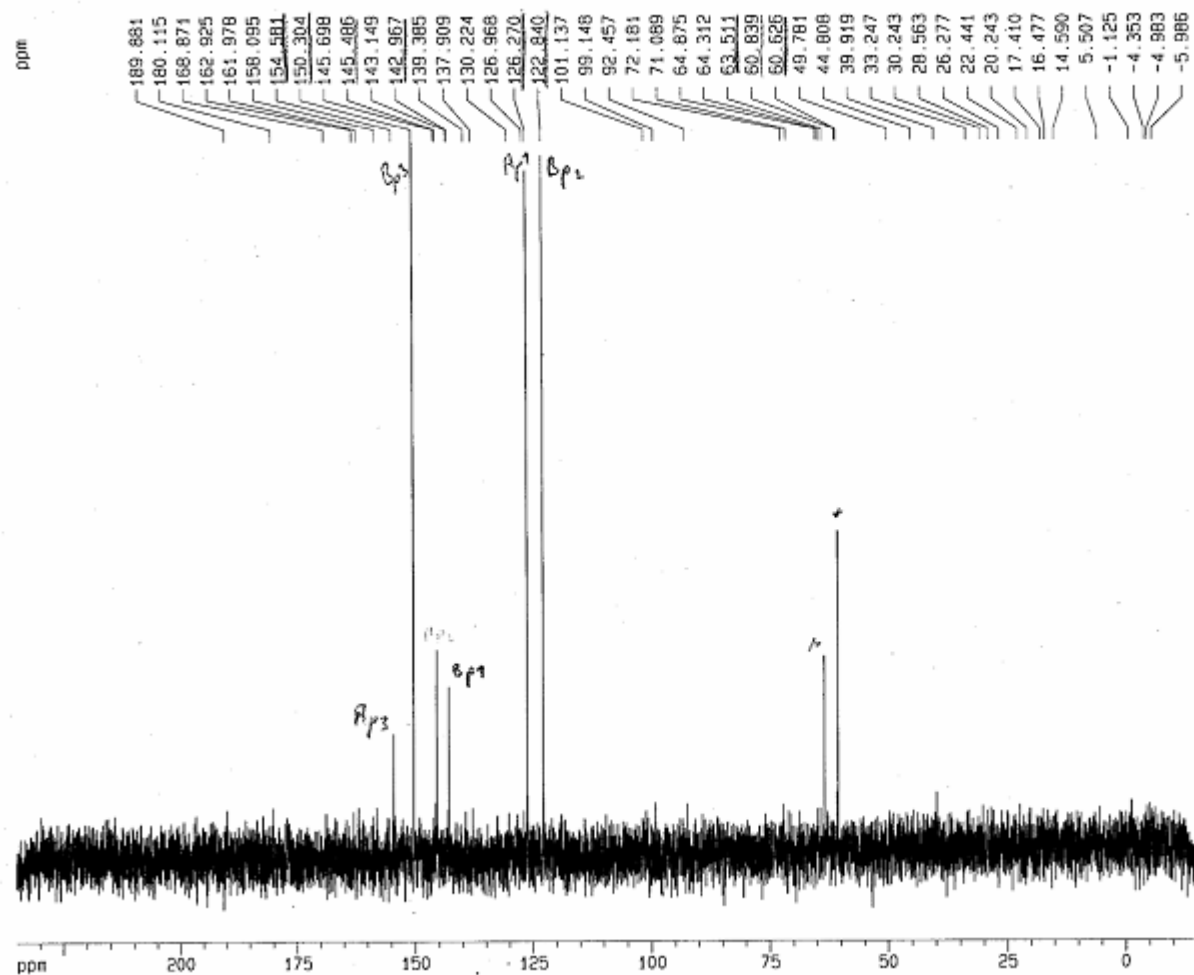

Current Data Parameters  
 NAME: 0030225  
 EXPNO: 3  
 PROCNO: 1

F2 - Acquisition Parameters  
 Date\_: 20030226  
 Time: 8.34  
 INSTRUM: spect  
 PROCNO: 5 nm GNP 5H/1  
 PULPROG: zgpg30  
 TD: 65536  
 SOLVENT: D2O  
 NS: 17922  
 DS: 4  
 SWH: 15723.271 Hz  
 FIDRES: 0.239918 Hz  
 AQ: 2.0840948 sec  
 RG: 4096  
 DM: 31.800 usec  
 DE: 6.00 usec  
 TE: 300.0 K  
 D1: 2.0000000 sec  
 d11: 0.0300000 sec  
 d12: 0.0000000 sec

\*\*\*\*\* CHANNEL f1 \*\*\*\*\*  
 NUC1: 13C  
 P1: 10.00 usec  
 PL1: 0.00 dB  
 SF01: 62.9021320 MHz

\*\*\*\*\* CHANNEL f2 \*\*\*\*\*  
 CPDPRG2: waltz16  
 NUC2: 1H  
 PCPD2: 80.00 usec  
 PL2: -4.00 dB  
 PL12: 15.00 dB  
 PL13: 20.00 dB  
 SF02: 250.1310005 MHz

F2 - Processing parameters  
 SI: 32768  
 SF: 62.8952140 MHz  
 WCN: EM  
 SSB: 0  
 LB: 1.00 Hz  
 GB: 0  
 PC: 1.40

1D NMR plot parameters  
 CX: 20.00 cm  
 F1P: 234.988 ppm  
 F1: 14779.62 Hz  
 F2P: -15.004 ppm  
 F2: -943.65 Hz  
 PRGM: 12.49958 ppm/cm  
 NZCM: 786.16357 Hz/cm

<sup>1</sup>H-NMR spectra of compound **p<sub>2</sub>OH** :

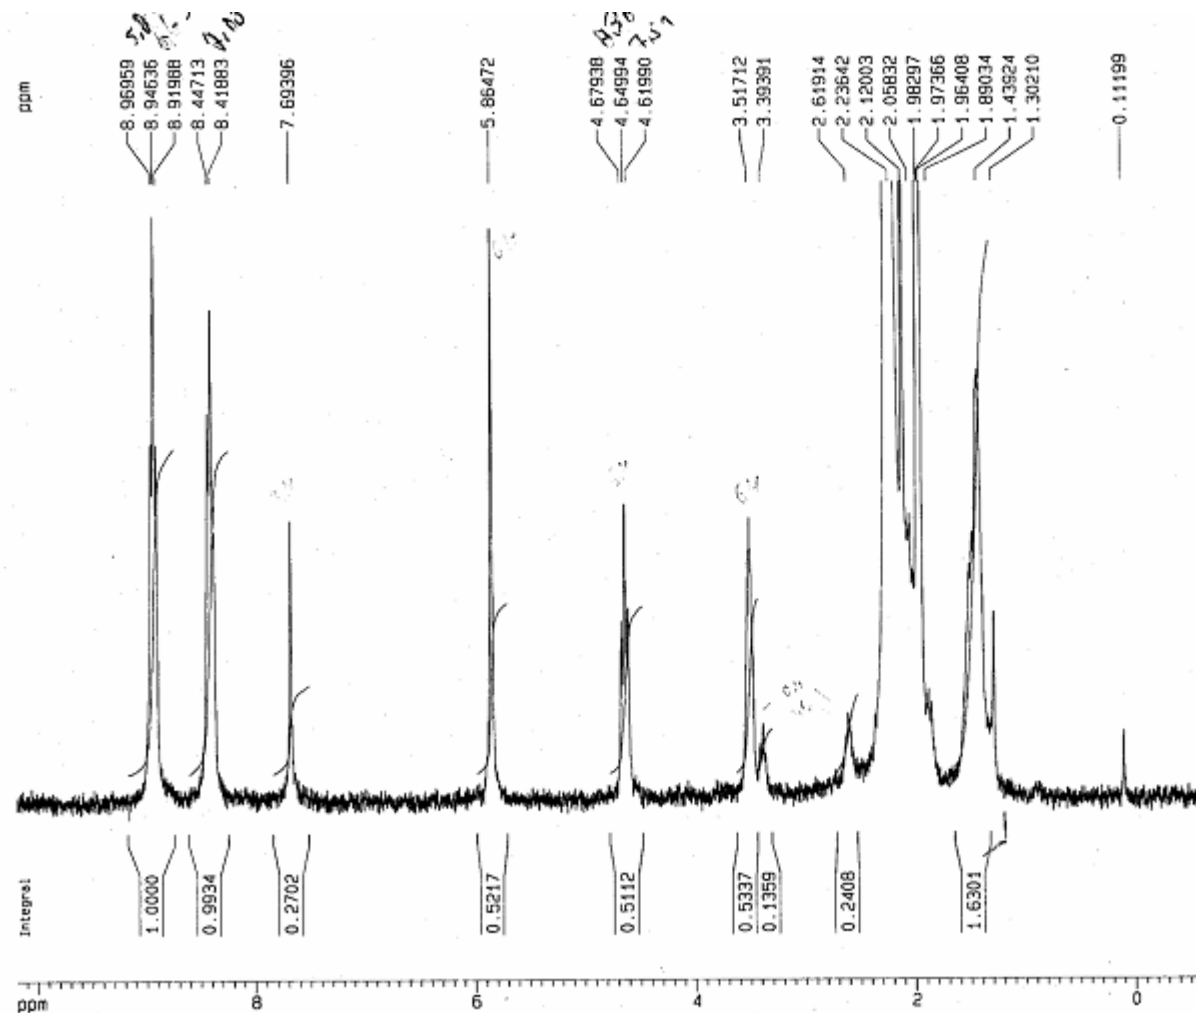

Current Data Parameters  
 NAME do05071205  
 EXPNO 2  
 PROCNO 1

F2 - Acquisition Parameters  
 Date\_ 20050712  
 Time 20.16  
 INSTRUM spect  
 PROBHD 5 mm QNP 1H/1  
 PULPROG zg30  
 TD 32768  
 SOLVENT CD3CN  
 NS 32  
 DS 2  
 SWH 5144.033 Hz  
 FIDRES 0.156583 Hz  
 AQ 3.1850996 sec  
 RG 1448.2  
 CW 97.200 usec  
 DE 6.00 usec  
 TE 300.0 K  
 D1 1.00000000 sec

----- CHANNEL f1 -----  
 NUC1 1H  
 P1 10.40 usec  
 PL1 -4.00 dB  
 SFO1 250.1315447 MHz

F2 - Processing parameters  
 SI 16384  
 SF 250.1300000 MHz  
 NDM EM  
 SSB 0  
 LB 0.30 Hz  
 GB 0  
 PC 1.00

1D NMR plot parameters  
 CX 20.00 cm  
 F1P 10.196 ppm  
 F1 2550.36 Hz  
 F2P -0.548 ppm  
 F2 -137.16 Hz  
 PPMCM 0.53722 ppm/cm  
 HZCM 134.37569 Hz/cm

<sup>13</sup>C-NMR spectra of compound p<sub>2</sub>OH :

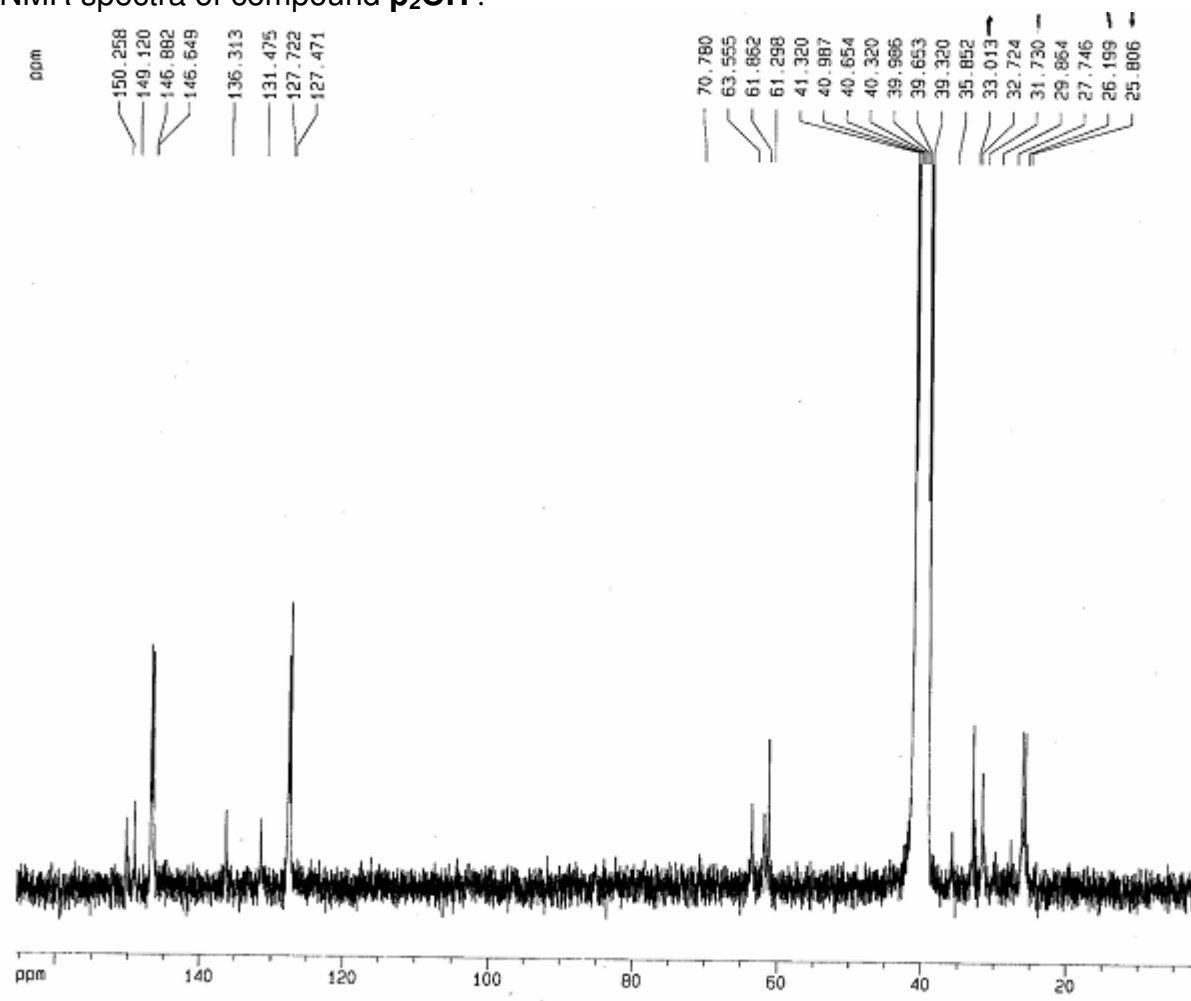

```

=====
NAME          db06051002
EXPNO         1
PROCNO        1

F2 - Acquisition Parameters
Date_         20060508
Time          10.10
INSTRUM       spect
PROBHD        5 mm QNP 1H/1
PULPROG       zgpg30
TD            65536
SOLVENT       DMSO
NS            12177
DS            4
SWH           15723.271 Hz
FIDRES        0.239018 Hz
AQ            2.0840848 sec
RG            4096
DM            31.800 usec
DE            6.00 usec
TE            300.0 K
D1            2.0000000 sec
d11           0.0300000 sec
d12           0.0000000 sec

----- CHANNEL f1 -----
NUC1          13C
P1            10.00 usec
PL1           0.00 dB
SFO1         62.9021320 MHz

----- CHANNEL f2 -----
COPROG2      waltz16
NUC2          1H
PCPD2        80.00 usec
PL2           -4.00 dB
PL12         15.00 dB
PL13         20.00 dB
SFO2         250.1310005 MHz

F2 - Processing parameters
SI            32768
SF            62.8952140 MHz
WDW           EM
SSB           0
LB            1.00 Hz
GB            0
PC            1.40

1D NMR plot parameters
CX            20.00 cm
F1P           165.397 ppm
F1            10402.69 Hz
F2P           2.127 ppm
F2            133.75 Hz
PPMDN         8.16354 ppm/cm
HZDM          513.44733 Hz/cm
    
```

<sup>1</sup>H-NMR spectra of compound **p<sub>2</sub>Br** :

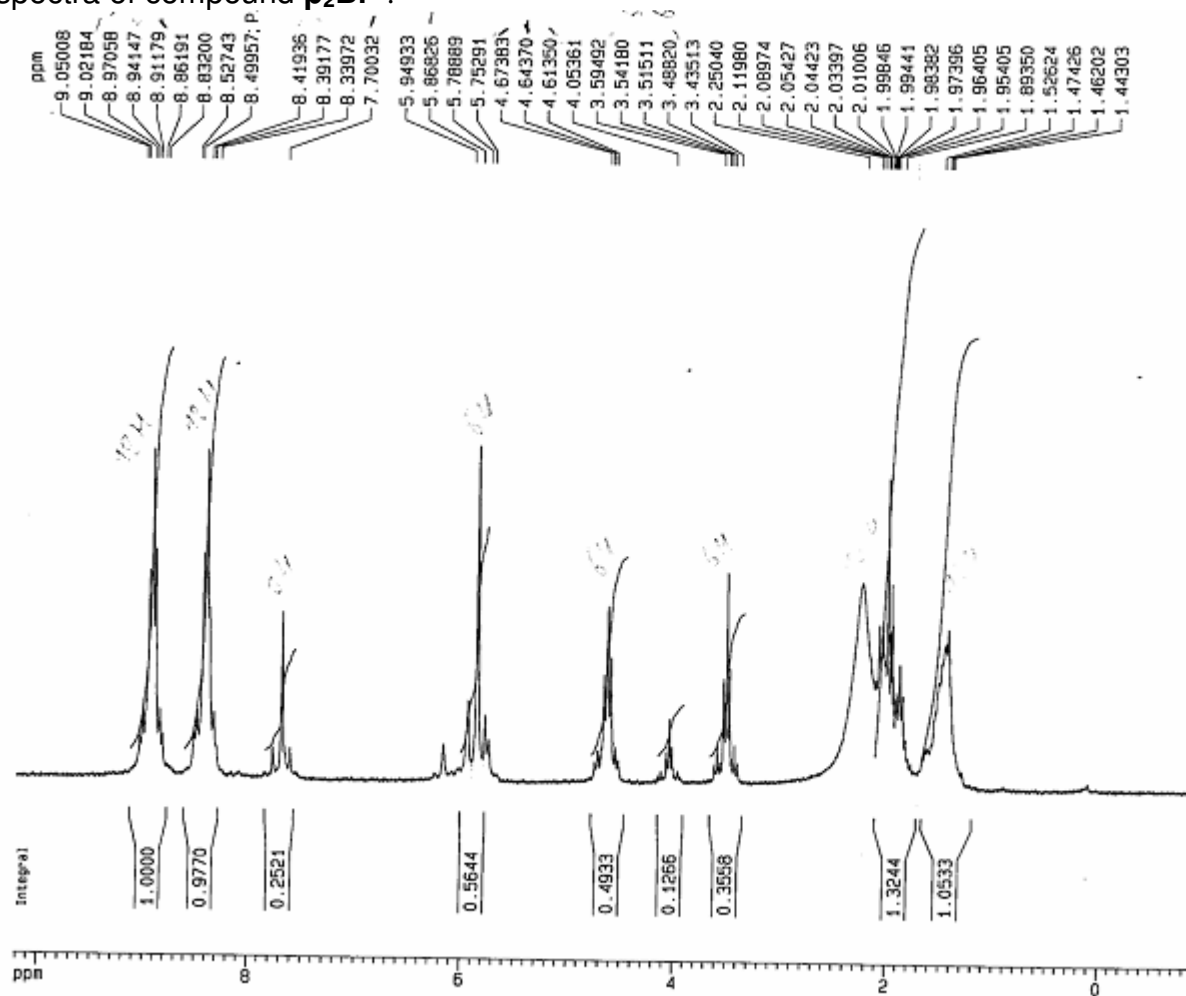

```

Current Data Parameters
NAME      db07080601
EXPNO    1
PROCNO   1

F2 - Acquisition Parameters
Date_    20070806
Time     19.24
INSTRUM  spect
PROBHD   5 mm QNP 1H/1
PULPROG  zg30
TD       32768
SOLVENT  CD3CN
NS       32
DS       2
SNH      5144.033 Hz
FIDRES   0.156983 Hz
AQ       3.1850996 sec
RG       1290.2
DW       97.200 usec
DE       6.00 usec
TE       300.0 K
D1       1.00000000 sec

----- CHANNEL f1 -----
NUC1     1H
P1       10.40 usec
PL1      -4.00 dB
SFO1     250.1315447 MHz

F2 - Processing parameters
SI       16384
SF       250.1300000 MHz
WDW      EM
SSB      0
LB       0.30 Hz
GB       0
PC       1.00

1D NMR plot parameters
CX       20.00 cm
F1P      10.208 ppm
F1       2553.25 Hz
F2P      -0.936 ppm
F2       -234.24 Hz
PPMCM    0.95721 ppm/cm
HZCM     139.37471 Hz/cm
    
```

<sup>13</sup>C-NMR spectra of compound **p2-Br**:

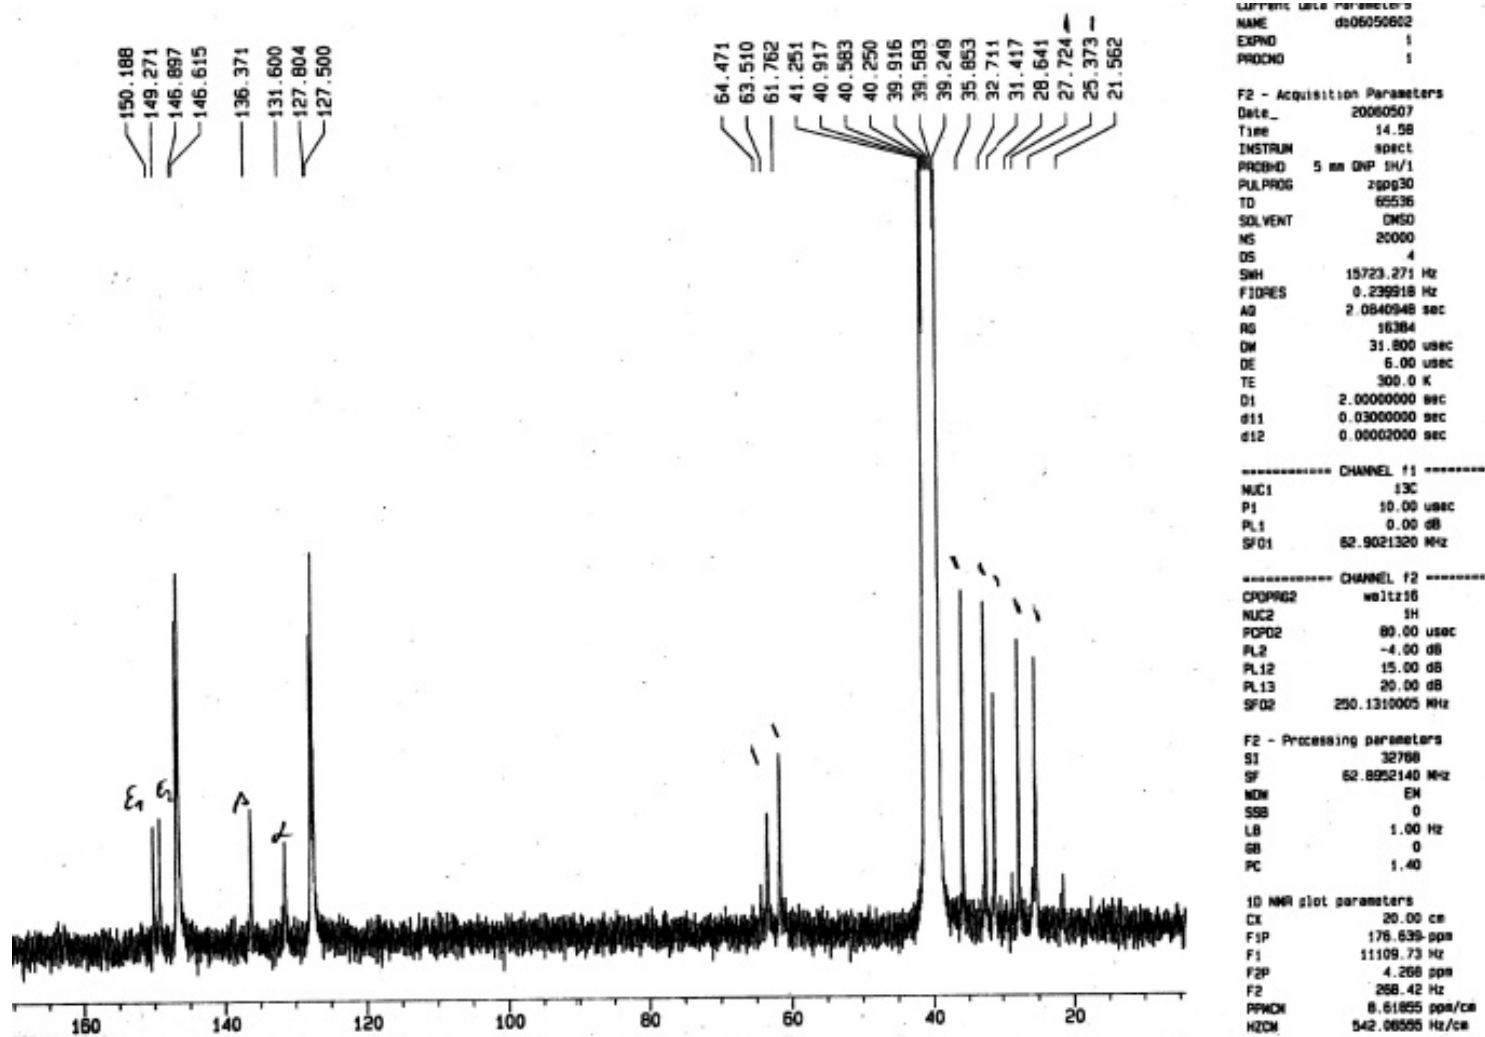



<sup>1</sup>H-NMR spectra of compound **p<sub>3</sub>OH** : Hexahydroxy-precursor

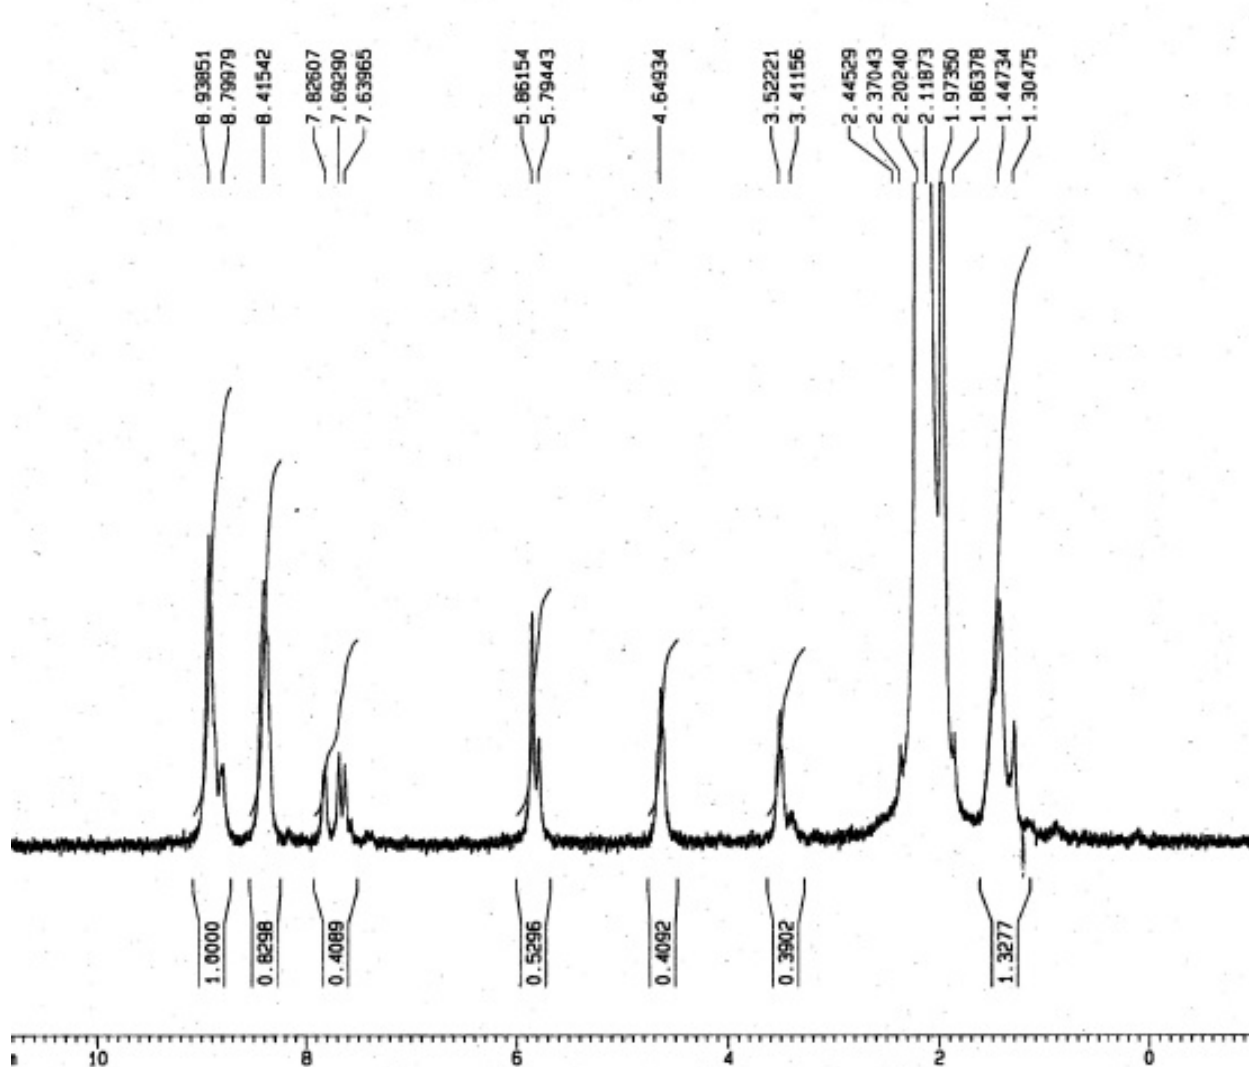

```

Current Data Parameters
NAME      db05071801
EXPNO     1
PROCNO    1

F2 - Acquisition Parameters
Date_     20050718
Time      14.15
INSTRUM   spect
PROBHD    5 mm QNP 1H/1
PULPROG   zg30
TD         32768
SOLVENT   CD3CN
NS         32
DS         2
SWH        5144.033 Hz
FIDRES     0.156983 Hz
AQ         3.1850996 sec
RG         1824.8
DN         97.200 usec
DE         5.00 usec
TE         300.0 K
D1         1.00000000 sec

----- CHANNEL f1 -----
NUC1       1H
P1         10.40 usec
PL1        -4.00 dB
SFO1       250.1315447 MHz

F2 - Processing parameters
SI         16384
SF         250.1300000 MHz
WDW        EM
SSB        0
LB         0.30 Hz
GB         0
PC         1.00

1D NMR plot parameters
CX         20.00 cm
F1P        11.073 ppm
F1         2769.68 Hz
F2P        -0.991 ppm
F2         -247.80 Hz
PPMCM      0.60318 ppm/cm
HZCM       150.87395 Hz/cm
    
```

$^{13}\text{C}$ -NMR spectra of compound  $\text{p}_3\text{OH}$  :

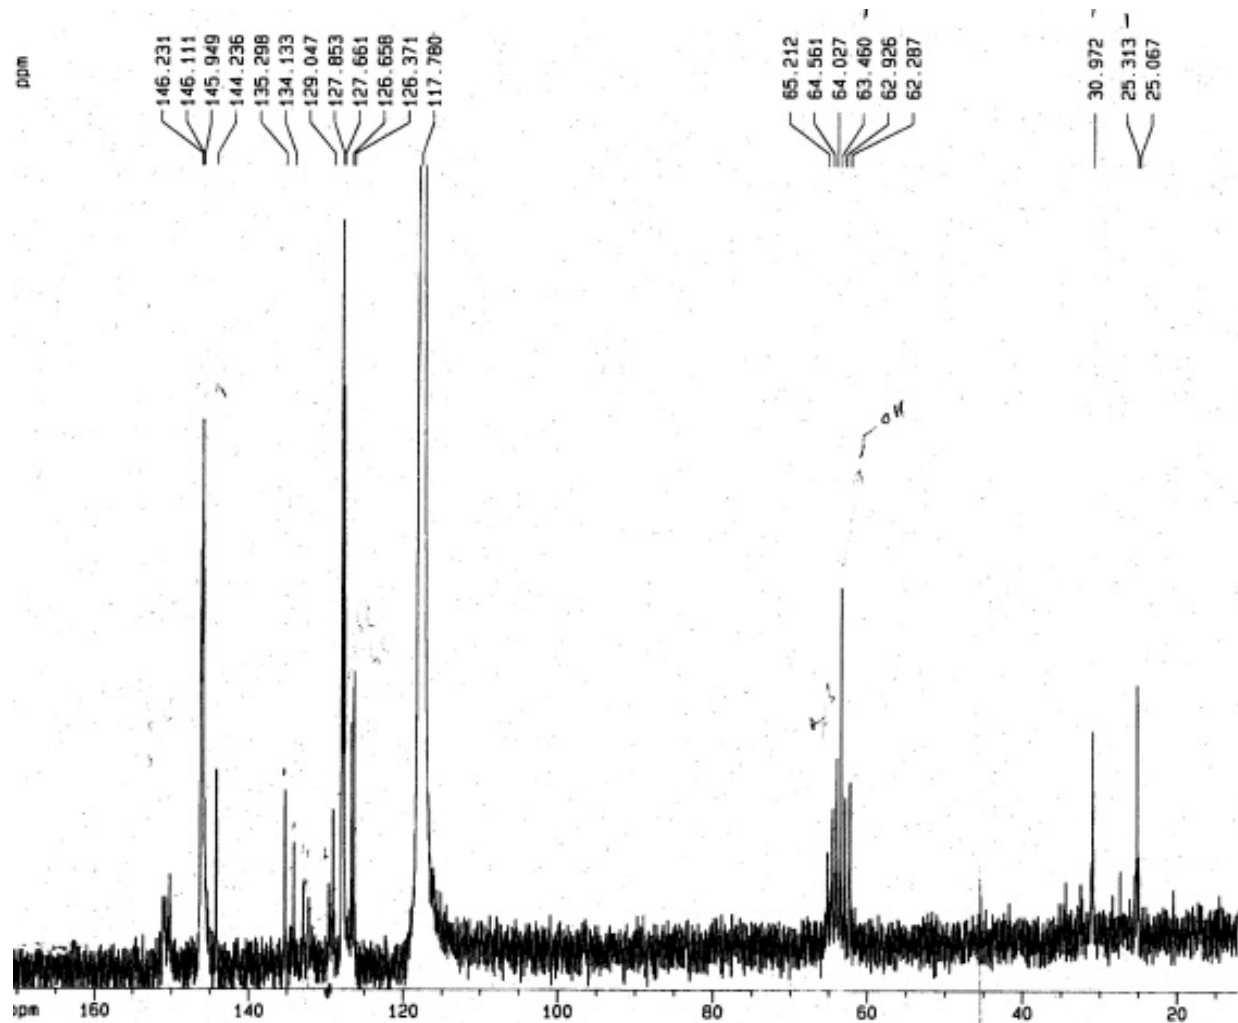

```

NAME      ds05080602
EXPNO     1
PROCNO    1

F2 - Acquisition Parameters
Date_     20050808
Time      16.41
INSTRUM   spect
PROBHD    5 mm GNP 1H/1
PULPROG   zgpg30
TD         65536
SOLVENT   CD3CN
NS         22258
DS         4
SFO1      15723.271 Hz
FIDRES    0.239918 Hz
AQ         2.0840948 sec
RG         8192
DN         31.800 usec
DE         5.00 usec
TE         300.0 K
D1         2.0000000 sec
d11        0.0300000 sec
d12        0.0002000 sec

----- CHANNEL f1 -----
NUC1       13C
P1         10.00 usec
PL1        0.00 dB
SFO1      62.9021320 MHz

----- CHANNEL f2 -----
CPOPRG2    mltz16
NUC2       1H
PCPD2      80.00 usec
PL2        -4.00 dB
PL12       15.00 dB
PL13       20.00 dB
SFO2      250.1310005 MHz

F2 - Processing parameters
SI         32768
SF         62.8952140 MHz
MG         EM
SSB        0
LB         1.00 Hz
GB         0
PC         1.40

1D NMR plot parameters
CX         20.00 cm
F1P        171.243 ppm
F1         10770.37 Hz
F2P        12.220 ppm
F2         788.61 Hz
PPH0K      7.95113 ppm/cm
HZCM       500.08785 Hz/cm
    
```

<sup>1</sup>H-NMR spectra of compound **p<sub>3</sub>Br** : Hexa-bromo-precursor

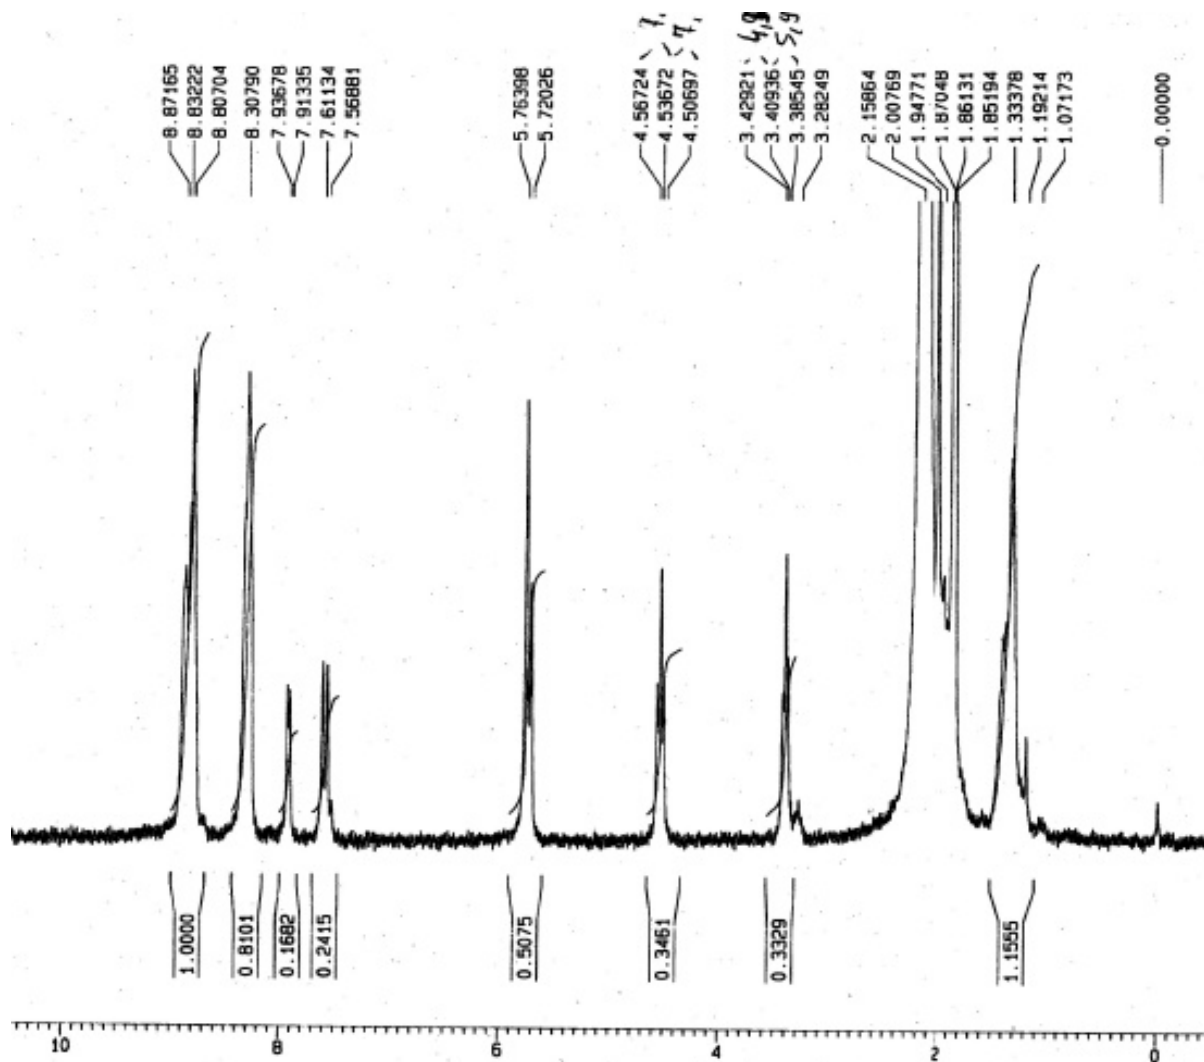

Current Data Parameters  
 NAME db05071207  
 EXPNO 2  
 PROCNO 1

F2 - Acquisition Parameters  
 Date\_ 20050712  
 Time 20.43  
 INSTRUM spect  
 PROBHD 5 mm GNP 1H/1  
 PULPROG zg30  
 TO 32768  
 SOLVENT CD3CN  
 NS 32  
 DS 2  
 SWH 5144.033 H  
 FIDRES 0.156983 H  
 AQ 3.185096 s  
 RG 1448.2  
 DM 97.200 u  
 DE 6.00 u  
 TE 300.0 K  
 D1 1.0000000 s

----- CHANNEL f1 -----  
 NUC1 1H  
 P1 10.40 u  
 PL1 -4.00 d  
 SFO1 250.1315447 M

F2 - Processing parameter  
 SI 16384  
 SF 250.1300282 M  
 MDW EM  
 SSB 0  
 LB 0.30 H  
 GB 0  
 PC 1.00

1D NMR plot parameters  
 CK 20.00 ci  
 F1P 10.759 pi  
 F1 2691.20 H  
 F2P -0.458 pi  
 F2 -114.64 H  
 PPM0H 0.56088 H  
 HZCM 140.29179 H

<sup>1</sup>H-NMR spectra of dendrimer : G<sub>1</sub>-Hexyl-COOH

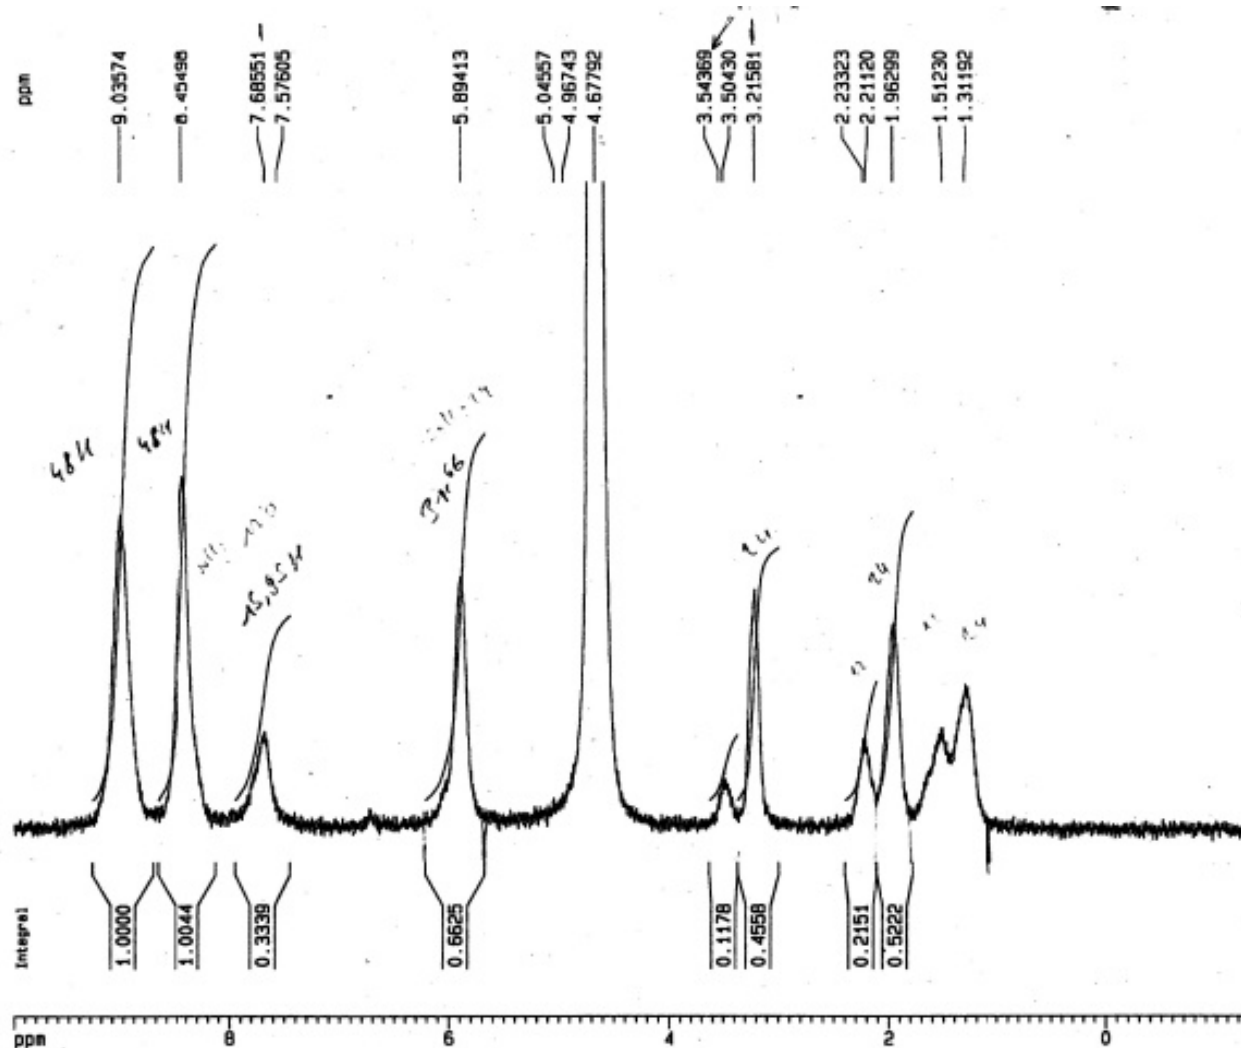

Current Date Parameters  
 NAME db07060305  
 EXPNO 1  
 PROCNO 1

F2 - Acquisition Parameters  
 Date\_ 20070601  
 Time 15.53  
 INSTRUM spect  
 PROBHD 5 mm QNP 1H/1  
 PULPROG zg30  
 TO 32768  
 SOLVENT D2O  
 NS 32  
 DS 2  
 SWH 5144.033 Hz  
 FIDRES 0.156983 Hz  
 AQ 3.1850996 sec  
 RG 1625.5  
 DW 97.200 usec  
 DE 6.00 usec  
 TE 300.0 K  
 D1 1.0000000 sec

----- CHANNEL f1 -----  
 NUC1 1H  
 P1 10.40 usec  
 PL1 -4.00 dB  
 SFO1 250.1315447 MHz

F2 - Processing parameters  
 SI 16384  
 SF 250.1300000 MHz  
 NDM EM  
 SSB 0  
 LB 0.30 Hz  
 GB 0  
 PC 1.00

ID NMR plot parameters  
 CX 20.00 cm  
 F1P 10.002 ppm  
 F1 2501.88 Hz  
 F2P -1.268 ppm  
 F2 -317.07 Hz  
 PPMCN 0.58350 ppm/cm  
 HZCN 140.94762 Hz/cm

<sup>13</sup>C-NMR spectra of dendrimer G<sub>1</sub>-Hexyl-COOH :

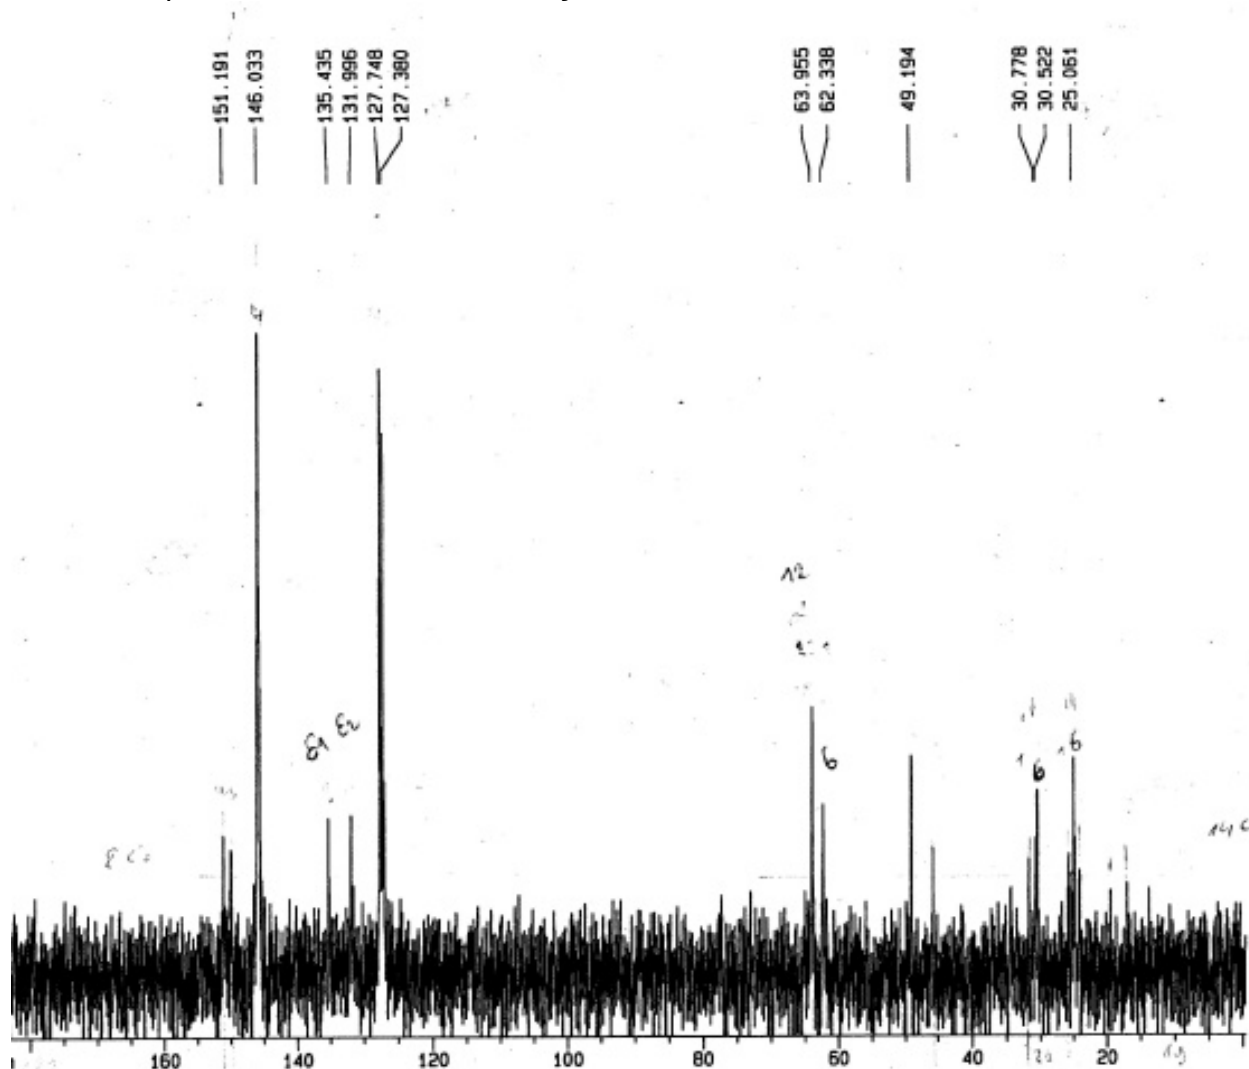

```

Current Data Parameters
NAME      db07060401
EXPNO     1
PROCNO    1

F2 - Acquisition Parameters
Date_     20070504
Time      9.04
INSTRUM   spect
PROBHD    5 mm DNP 1H/1
PULPROG   zgpg30
TD         65536
SOLVENT   D2O
NS         57297
DS         4
SHE       15723.271 Hz
FIDRES    0.239918 Hz
AQ        2.0840948 sec
RG         8152
DW        31.800 usec
DE        6.00 usec
TE        300.0 K
D1        2.0000000 sec
d11       0.0300000 sec
d12       0.0002000 sec

----- CHANNEL f1 -----
NUC1      13C
P1        10.00 usec
PL1       0.00 dB
SFO1      62.5021320 MHz

----- CHANNEL f2 -----
CPOPRG2   waltz16
NUC2       1H
PCPD2     80.00 usec
PL2       -4.00 dB
PL12      15.00 dB
PL13      20.00 dB
SFO2      250.1310005 MHz

F2 - Processing parameters
SI        32768
SF        62.8952140 MHz
MC        EM
SSB       0
LB        1.00 Hz
GB        0
PC        1.40

1D NMR plot parameters
CX        20.00 cm
F1P       187.250 ppm
F1        11777.44 Hz
F2P       -0.441 ppm
F2        -27.73 Hz
PPMCK     9.38479 ppm/t
HZCK      590.25867 Hz/cf
    
```

<sup>1</sup>H-NMR spectra of compound : **G<sub>1</sub>-COOH**

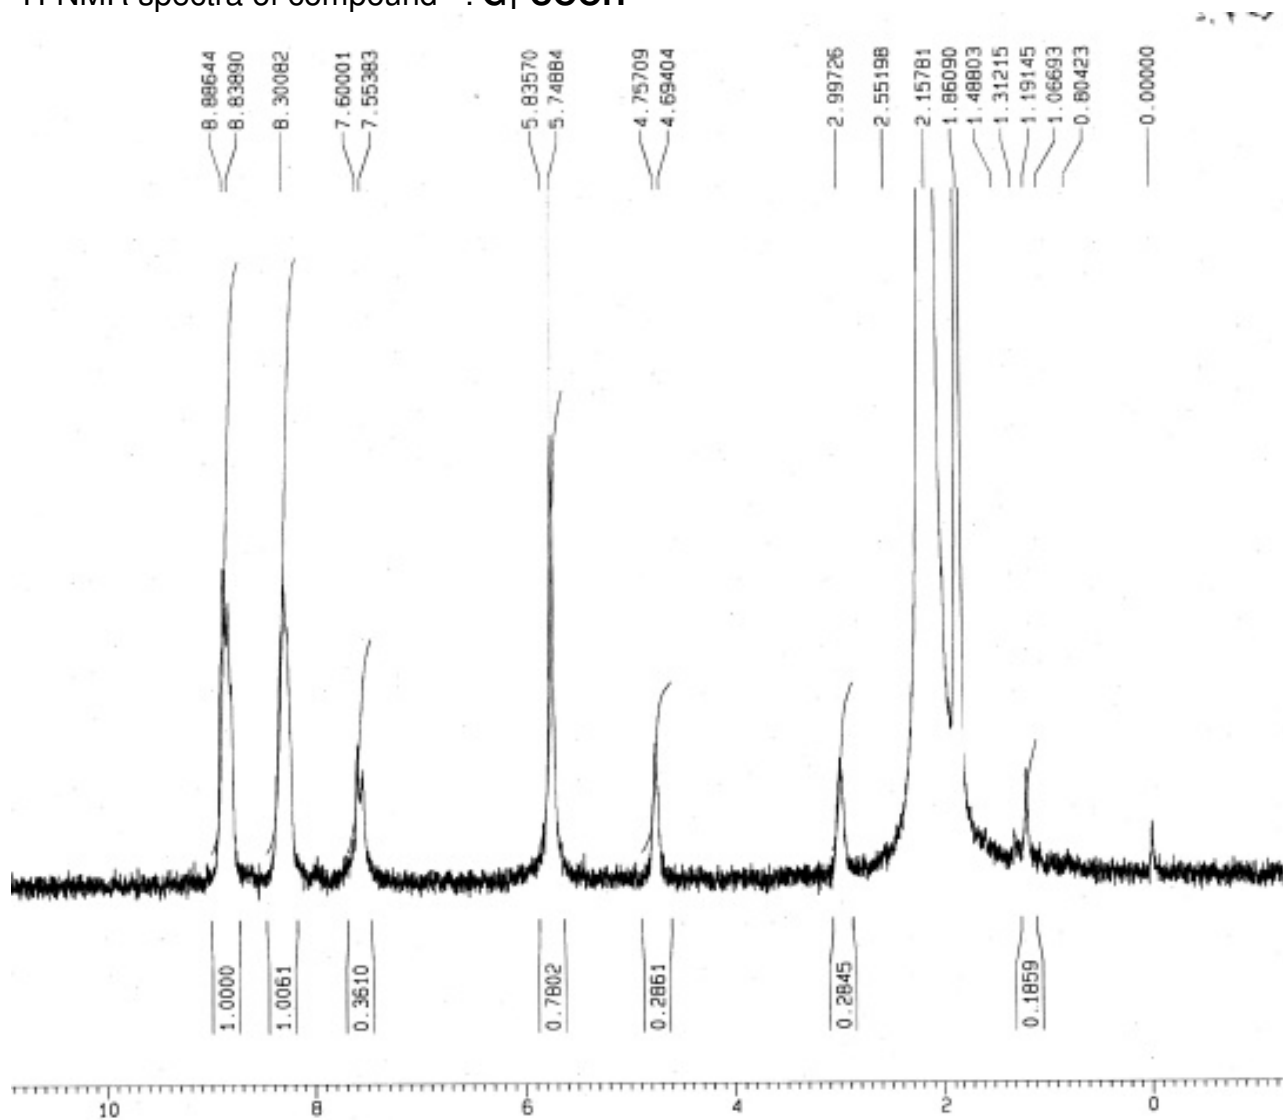

```

NAME          db05040503
EXPNO         3
PROCNO        1

F2 - Acquisition Parameters
Date_         20050405
Time          15.37
INSTRUM       spect
PROBHD        5 mm QNP 1H/1
PULPROG       zg30
TD            32768
SOLVENT       CD3CN
NS            32
DS            2
SWH           5144.033 Hz
FIDRES        0.156983 Hz
AQ            3.1850996 sec
RG            2048
DM            97.200 us
DE            6.00 us
TE            300.0 K
D1            1.00000000 sec

----- CHANNEL f1 -----
NUC1          1H
P1            10.40 us
PL1           -4.00 dB
SFO1          250.1315447 MHz

F2 - Processing parameters
SI            16384
SF            250.1300279 MHz
WDW           EM
SSB           0
LB            0.30 Hz
GB            0
PC            1.00

1D NMR plot parameters
CX            20.00 cm
F1P           11.473 ps
F1            2869.75 Hz
F2P           -1.268 ps
F2            -317.25 Hz
PPMCM         0.63707 ps
HZCM          159.35025 Hz
    
```

<sup>13</sup>C-NMR spectra of compound : **G<sub>1</sub>-COOH**

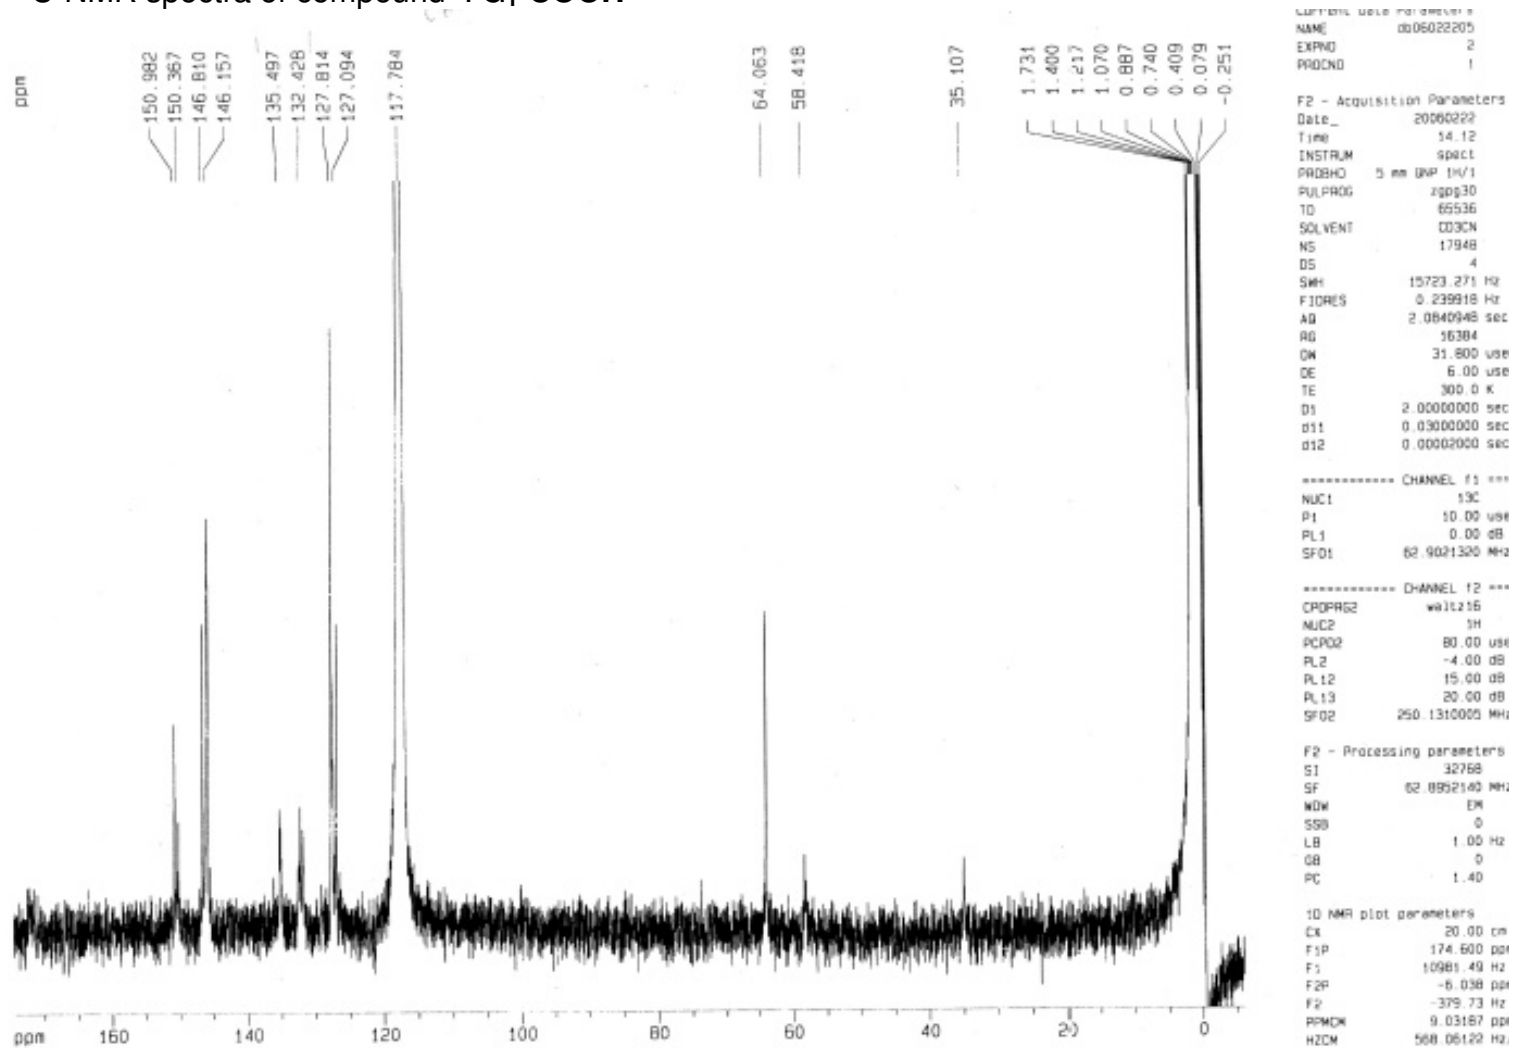

<sup>1</sup>H-NMR spectra of G<sub>0</sub>-OH:

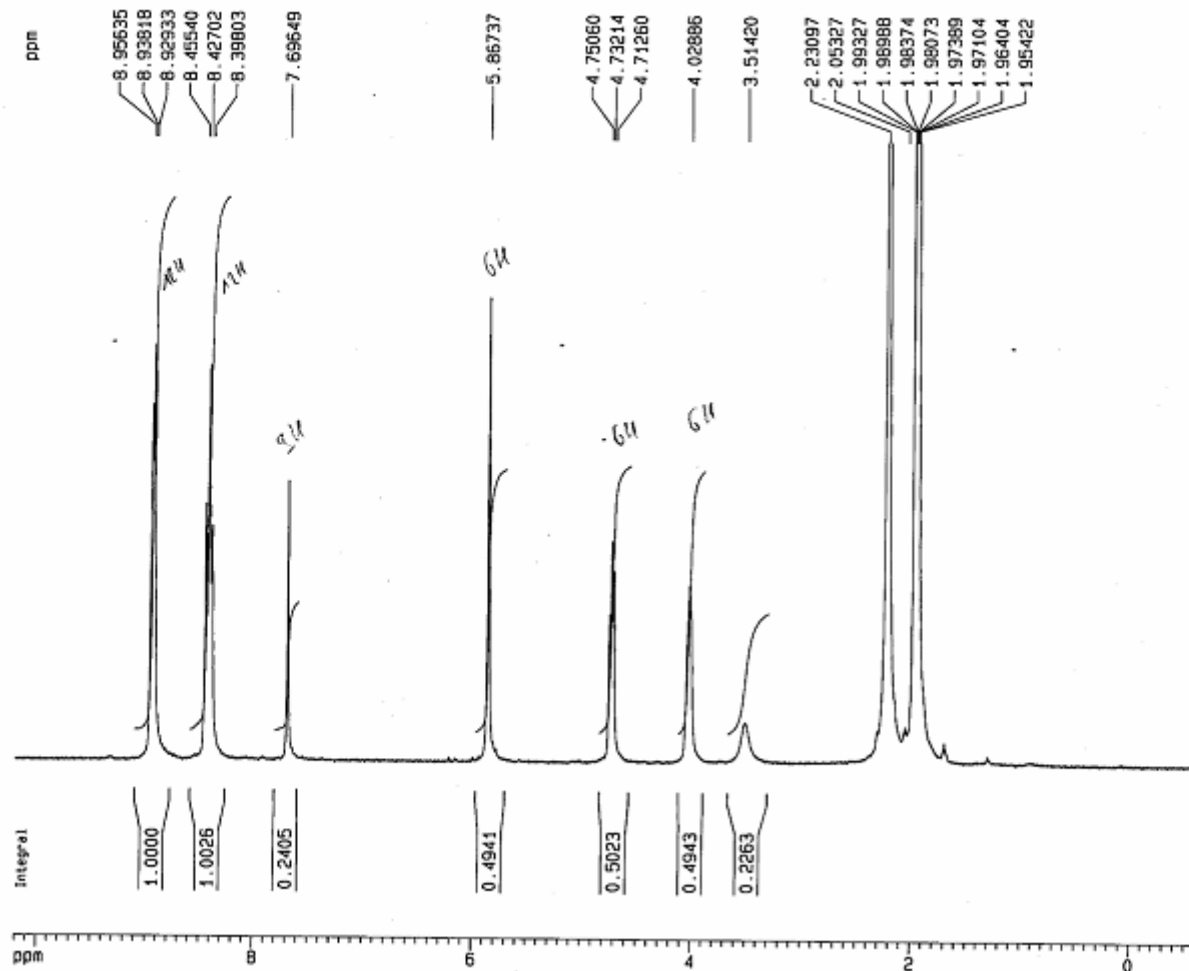

Current Data Parameters  
 NAME db07021501  
 EXPNO 1  
 PROCNO 1

F2 - Acquisition Parameters  
 Date\_ 20070213  
 Time 19.04  
 INSTRUM spect  
 PROBHD 5 mm QNP 1H/1  
 PULPROG zg30  
 TO 32768  
 SOLVENT CD3CN  
 NS 32  
 DS 2  
 SWH 5144.033 Hz  
 FIDRES 0.150983 Hz  
 AQ 3.1850996 sec  
 RG 812.7  
 CW 97.200 usec  
 DE 6.00 usec  
 TE 300.0 K  
 D1 1.00000000 sec

----- CHANNEL f1 -----  
 NUC1 1H  
 P1 10.40 usec  
 PL1 -4.00 dB  
 SFO1 250.1315447 MHz

F2 - Processing parameters  
 S1 16384  
 SF 250.1300000 MHz  
 NDM EM  
 SSB 0  
 LB 0.30 Hz  
 GB 0  
 PC 1.00

1D NMR plot parameters  
 CX 20.00 cm  
 F1P 10.202 ppm  
 F1 2551.82 Hz  
 F2P -0.602 ppm  
 F2 -150.60 Hz  
 PPMCK 0.54020 ppm/cm  
 HZCM 135.12103 Hz/cm



<sup>13</sup>C-NMR spectra of G<sub>0</sub>-OH:

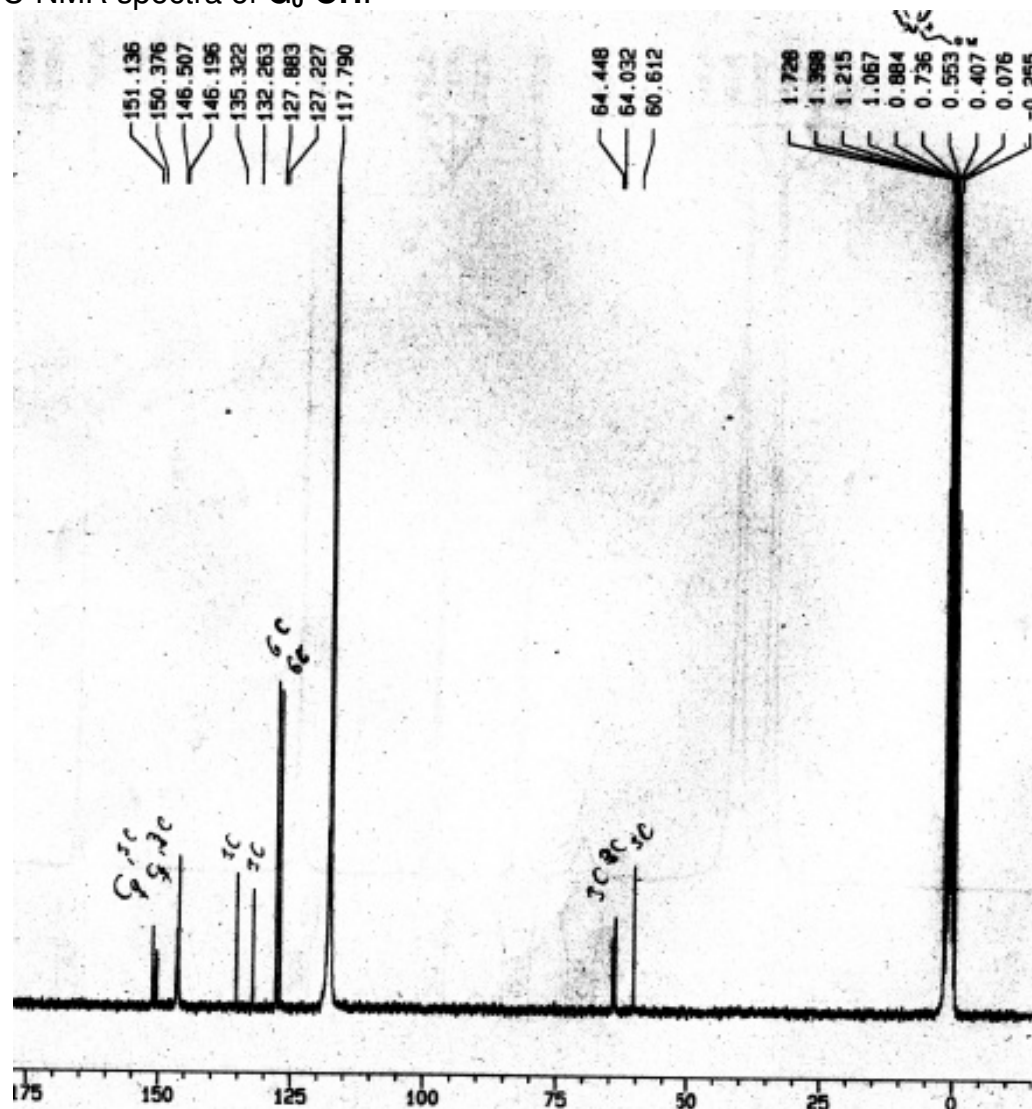

```

Current Data Parameters
NAME      007021506
EXPNO     1
PROCNO    1

F2 - Acquisition Parameters
Date_     20070215
Time      8.58
INSTRUM   spect
PROBHD    5 mm QNP 1H/1
PULPROG   zgpg30
TD         65536
SOLVENT   CD3CN
NS         11685
DS         4
SFO1      15729.271 Hz
FIDRES    0.239918 Hz
AQ         2.0540948 sec
RG         15384
DSH        31.800 usec
DE         8.00 usec
TE         300.0 K
D1         2.00000000 sec
d11        0.03000000 sec
d12        0.00000000 sec

----- CHANNEL f1 -----
NUC1      13C
P1         10.00 usec
PL1        0.00 dB
SFO1      62.9021320 MHz

----- CHANNEL f2 -----
CPDPRG2   waltz16
NUC2       1H
PCPD2     80.00 usec
PL2        -4.00 dB
PL12       15.00 dB
PL13       20.00 dB
SFO2      250.1310005 MHz

F2 - Processing parameters
SI         32768
SF         62.902140 MHz
WDW        EM
SSB        0
LB         1.00 Hz
GB         0
PC         1.40

1D NMR plot parameters
CX         20.00 cm
FIP        234.988 ppm
F1         14776.62 Hz
F2P        -15.003 ppm
F2         -943.86 Hz
PPHM       12.49887 ppm/cm
  
```

## 2. Pictures of transfected CHO cells

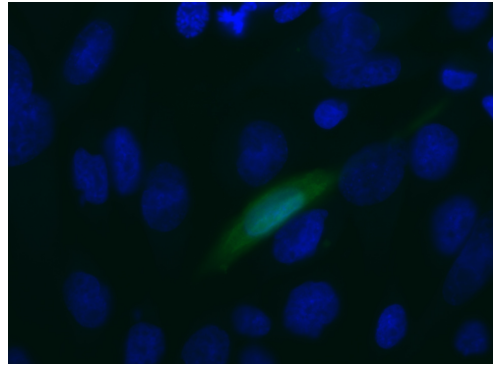

6  $\mu\text{g}$  Carboxy-term.,hexamethylene-bridged Dend. **G<sub>1</sub>-Hexyl-COOH**  
2  $\mu\text{g}$  Plasmid-DNA, pC1-eGFP in 0.5 ml  
TE buffer

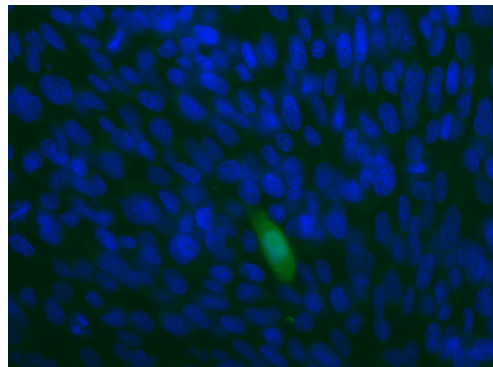

4  $\mu\text{g}$  **G<sub>1</sub>-Hexyl-COOH**  
2  $\mu\text{g}$  Plasmid-DNA, pC1-eGFP in 0.5 ml  
TE buffer
